# Supplementary material for: Diastereoselective synthesis of tetrahydropyrans via Prins–Ritter and Prins–arylthiolation cyclization reactions
Source: Royal Society of Chemistry journal article supplement (doi:10.1039/c6ob02692c), 2017-01-01

## Diastereoselective Synthesis of Tetrahydropyrans via Prins-Ritter and Prins-arythiolation Cyclization Reactions

Nabajyoti Hazarika,<sup>a,b</sup> Barnail Sarmah,<sup>a,b</sup> Manabjyoti Bordoloi,<sup>a</sup> Prodeep Phukan<sup>b\*</sup> and Gakul Baishya<sup>a\*</sup>

<sup>a</sup>*Natural Products Chemistry Group, Chemical Science & Technology Division*

*CSIR-North East Institute of Science & Technology, Jorhat - 785006, India.*

<sup>b</sup>*Department of Chemistry, Gauhati University, Guwahati - 781014, India*

### Table of Content

|                                                                   |        |
|-------------------------------------------------------------------|--------|
| 1. Spectra of <sup>1</sup> H and <sup>13</sup> C of all compounds | S2-S33 |
| 2. NOESY spectrum of the compound <b>4c</b>                       | S-34   |

Name of Sample: NH-Benzaldehyde  
Spectrum No : 6640

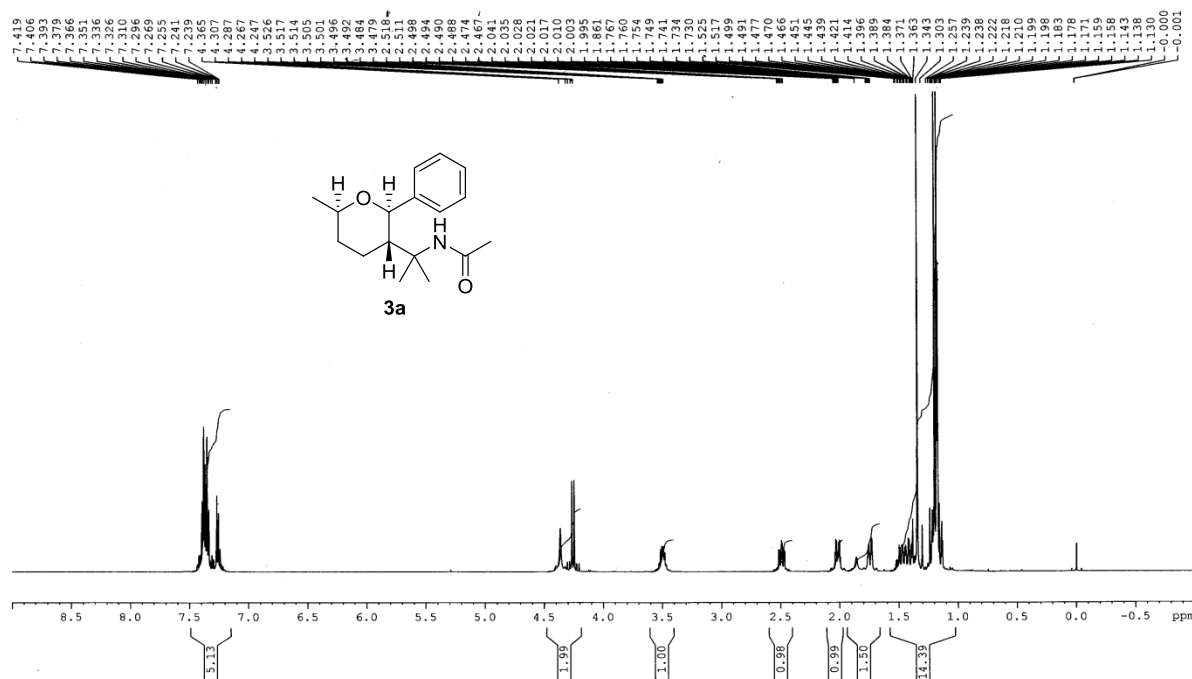

Name of Sample: NH-Benzal  
Spectrum No : 6642

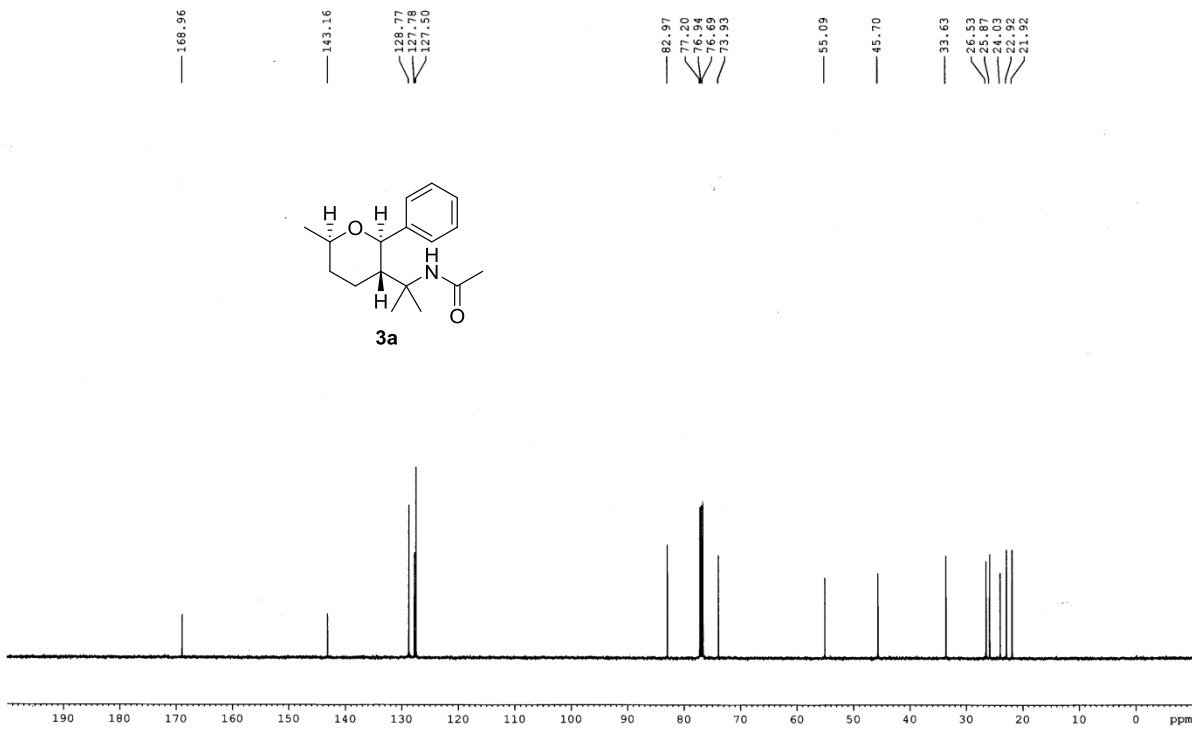

5298  
NH-Naphth

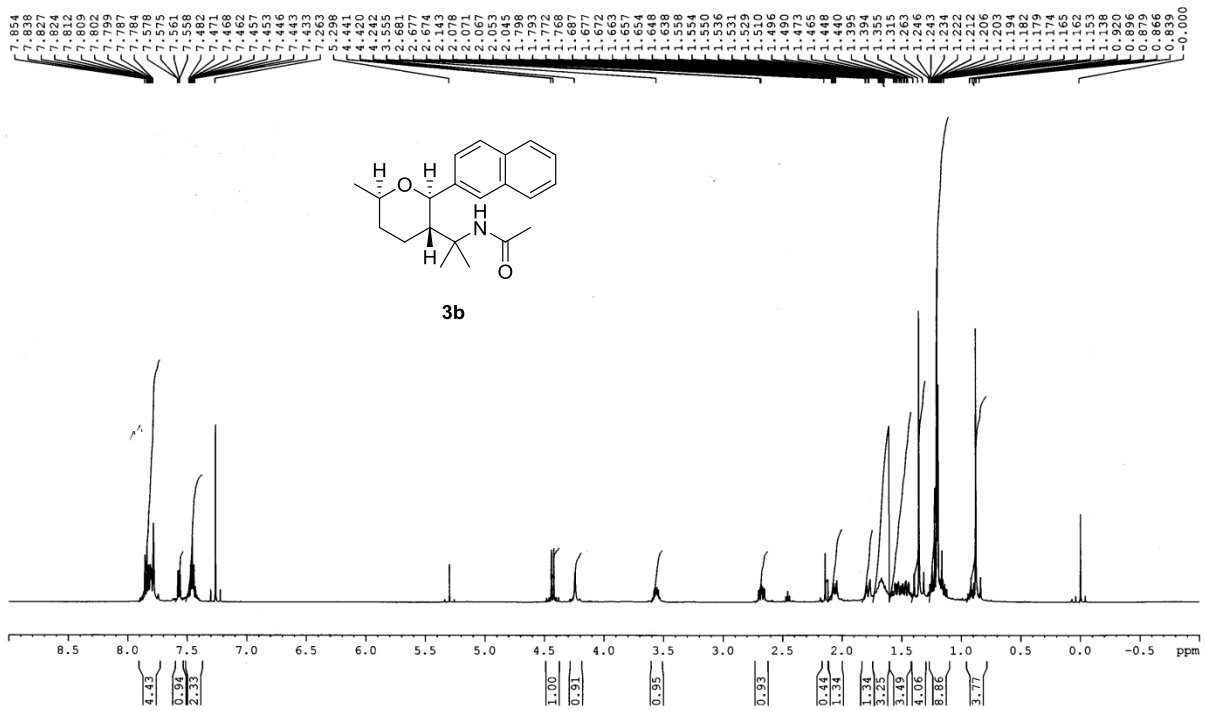

Name of Sample: NH-naph  
Spectrum No : 5275

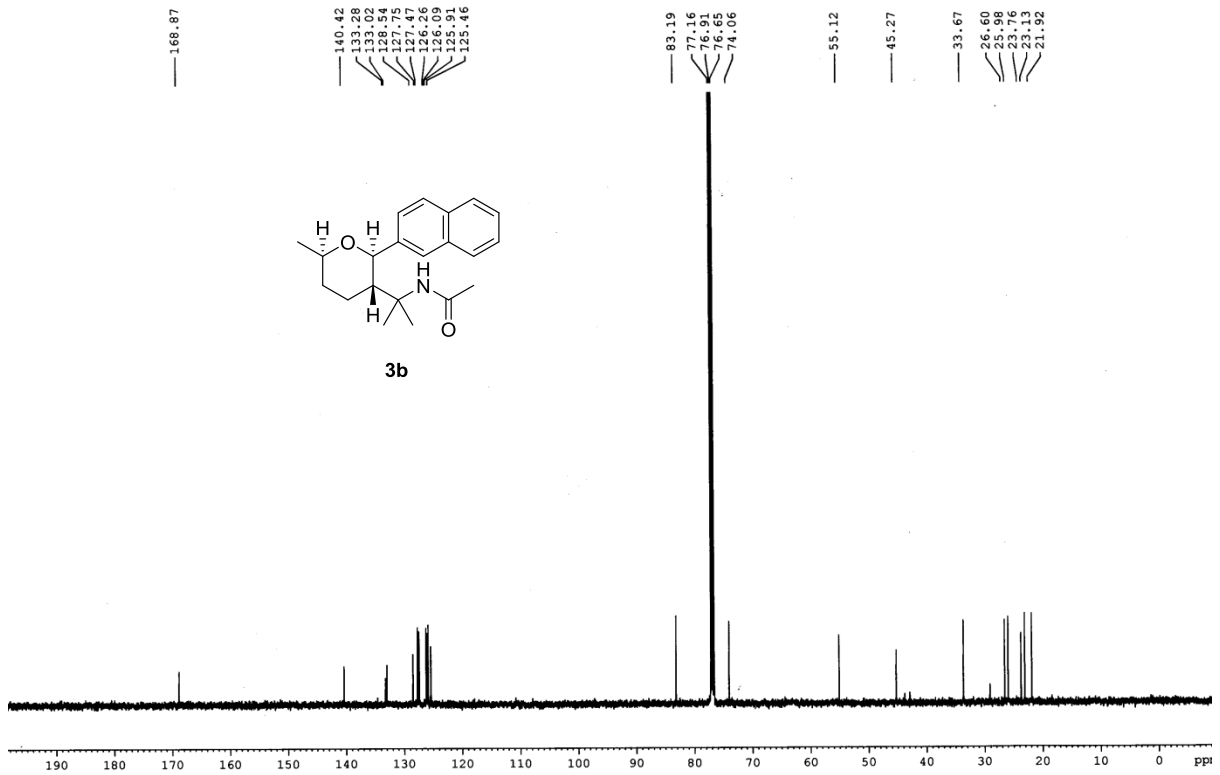

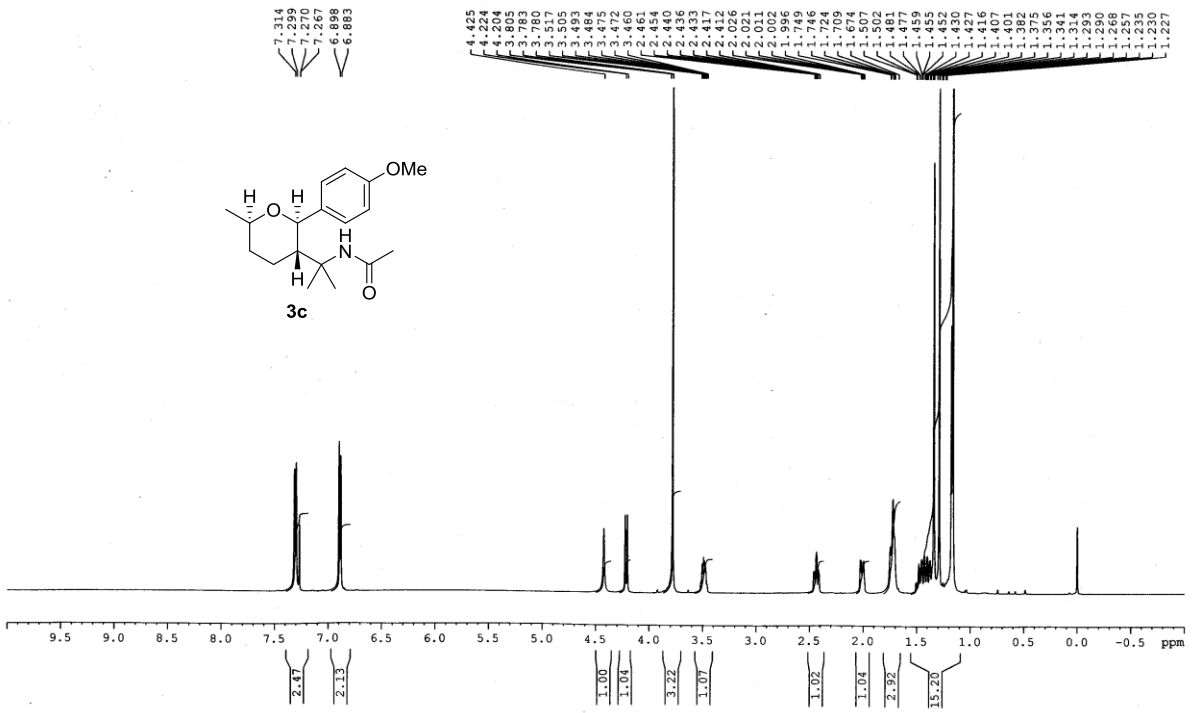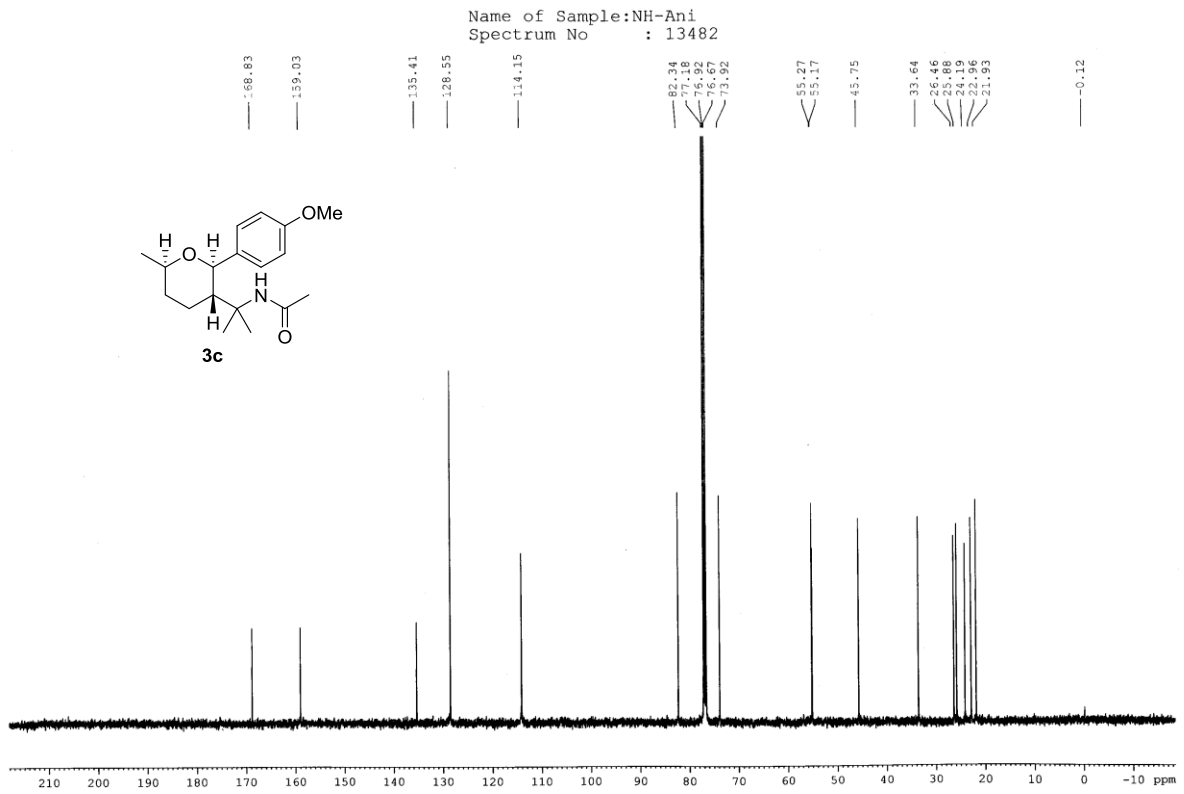

NH-Tolu  
4846

7.311  
7.289  
7.274  
7.256  
7.250  
7.202  
7.186  
7.162  
7.147  
7.123  
7.108

4.442  
4.404  
4.368  
4.272  
4.251  
4.232  
4.172  
4.172  
3.501  
3.490  
3.484  
3.480  
3.472  
2.482  
2.419  
2.416  
2.399  
2.394  
2.344  
2.304  
2.276  
2.142  
2.045  
2.022  
2.017  
1.998  
1.984  
1.953  
1.953  
1.912  
1.746  
1.721  
1.692  
1.659  
1.597  
1.581  
1.565  
1.551  
1.537  
1.507  
1.500  
1.482  
1.464  
1.454  
1.429  
1.408  
1.402  
1.377  
1.337  
1.281  
1.274  
1.254  
1.213  
1.174  
1.163  
1.154  
1.108  
1.046  
1.036  
1.036  
0.939

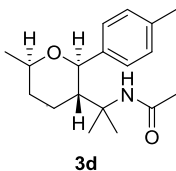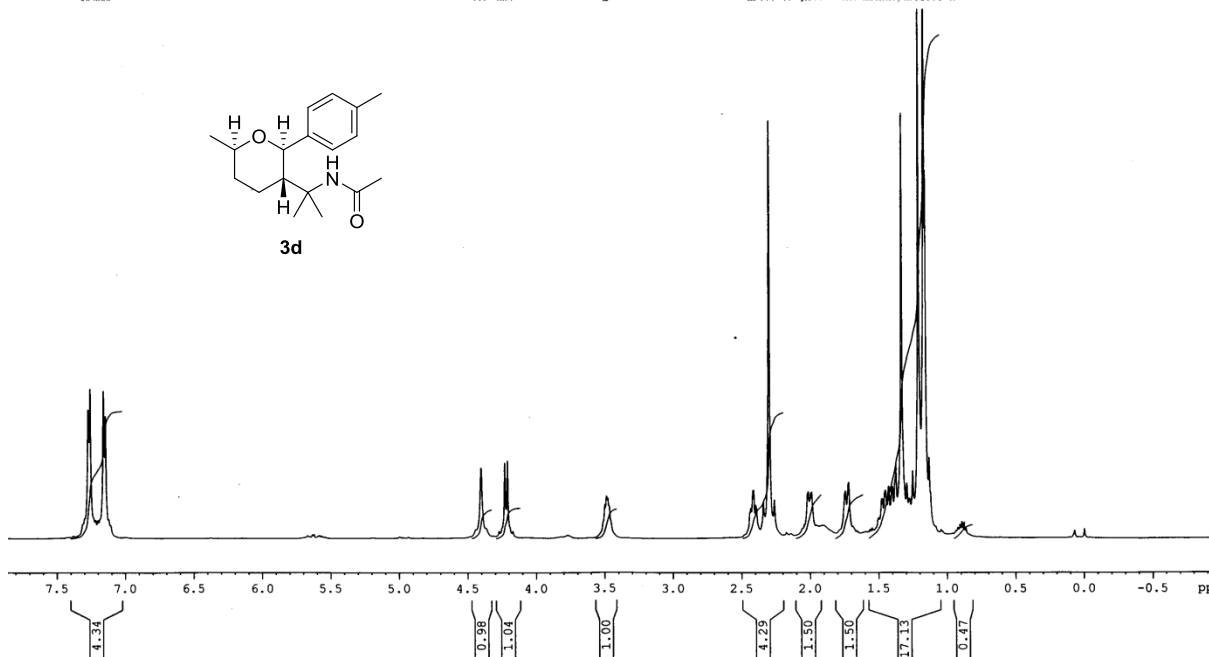

Tolu  
4847

168.89  
140.14  
137.38  
129.37  
127.37

82.66  
77.20  
76.84  
73.90  
55.17  
45.95  
33.64  
26.45  
25.84  
23.92  
22.79  
22.35  
20.96

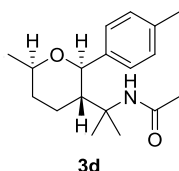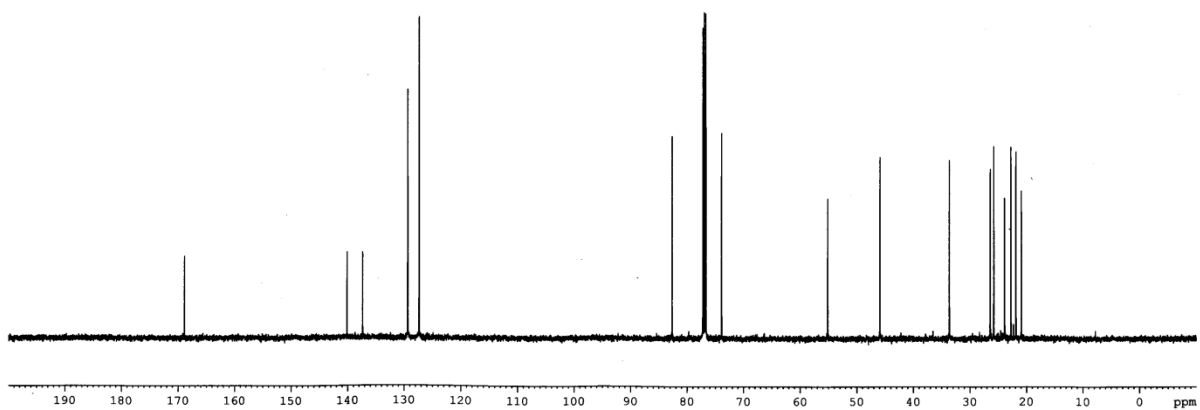

NH-Vera  
5770

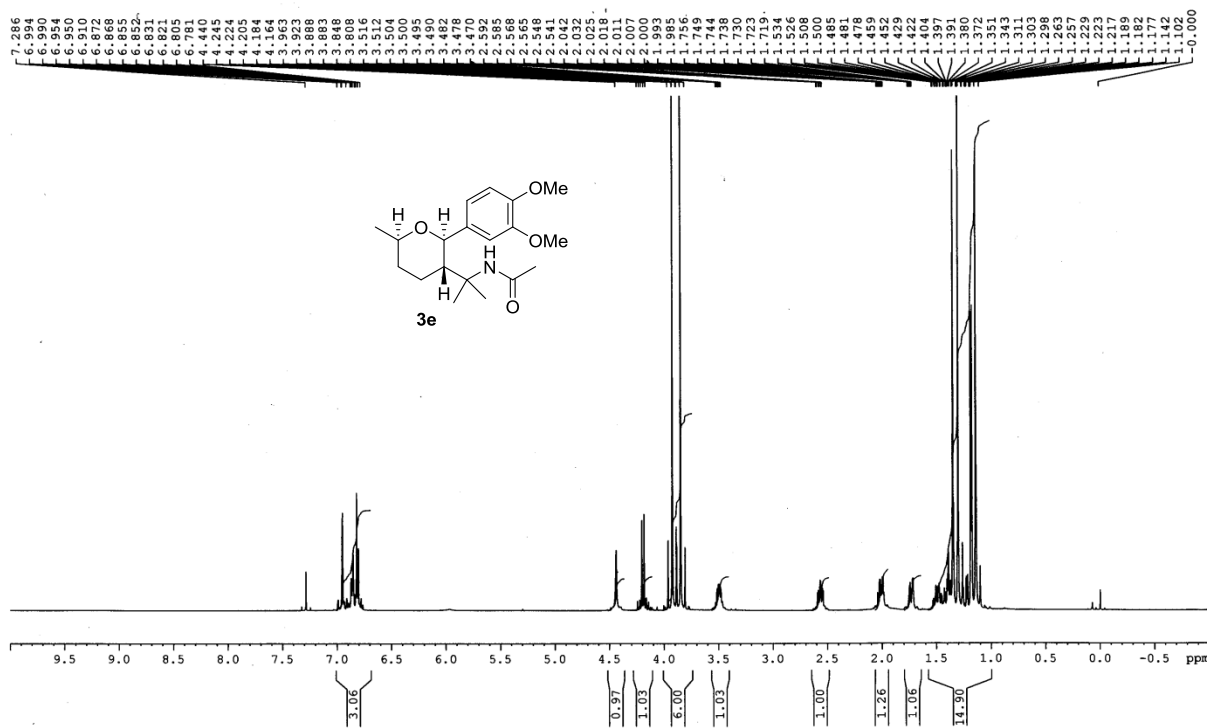

Nh-Vera  
5774

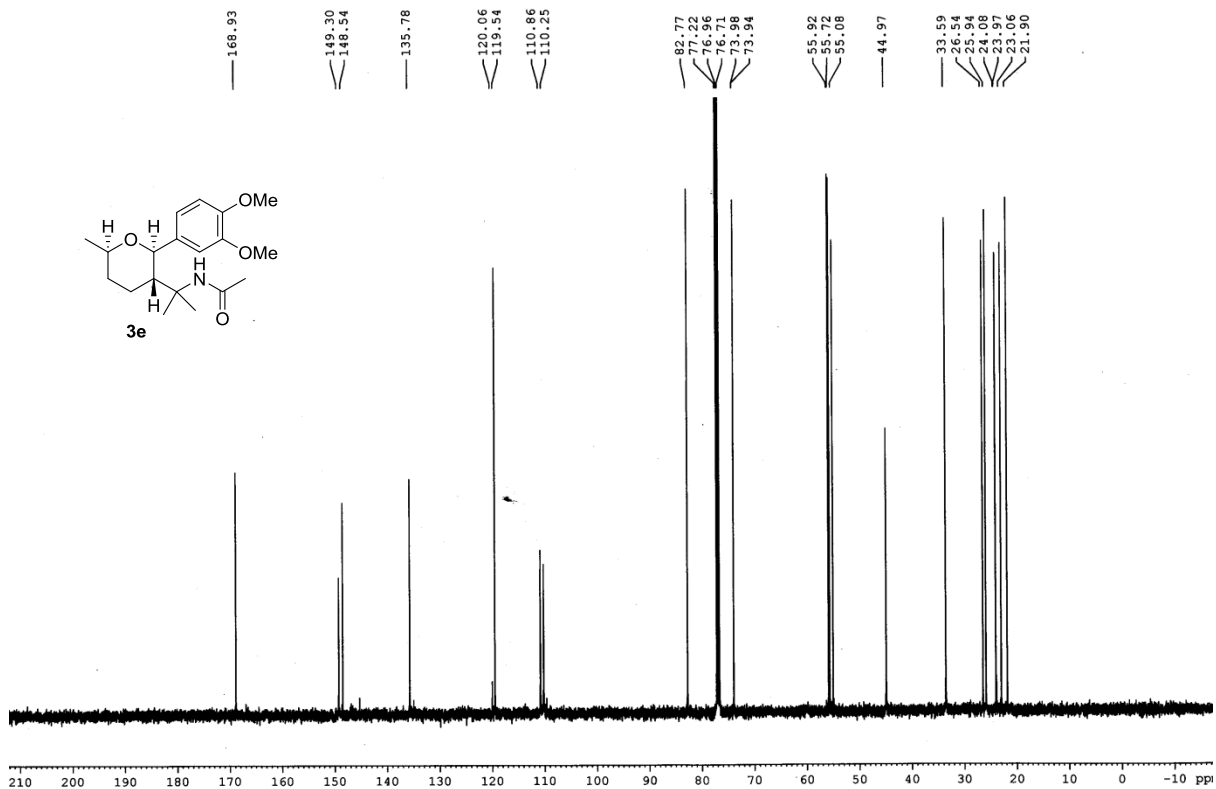

NH-3,4,5-OMe  
6447

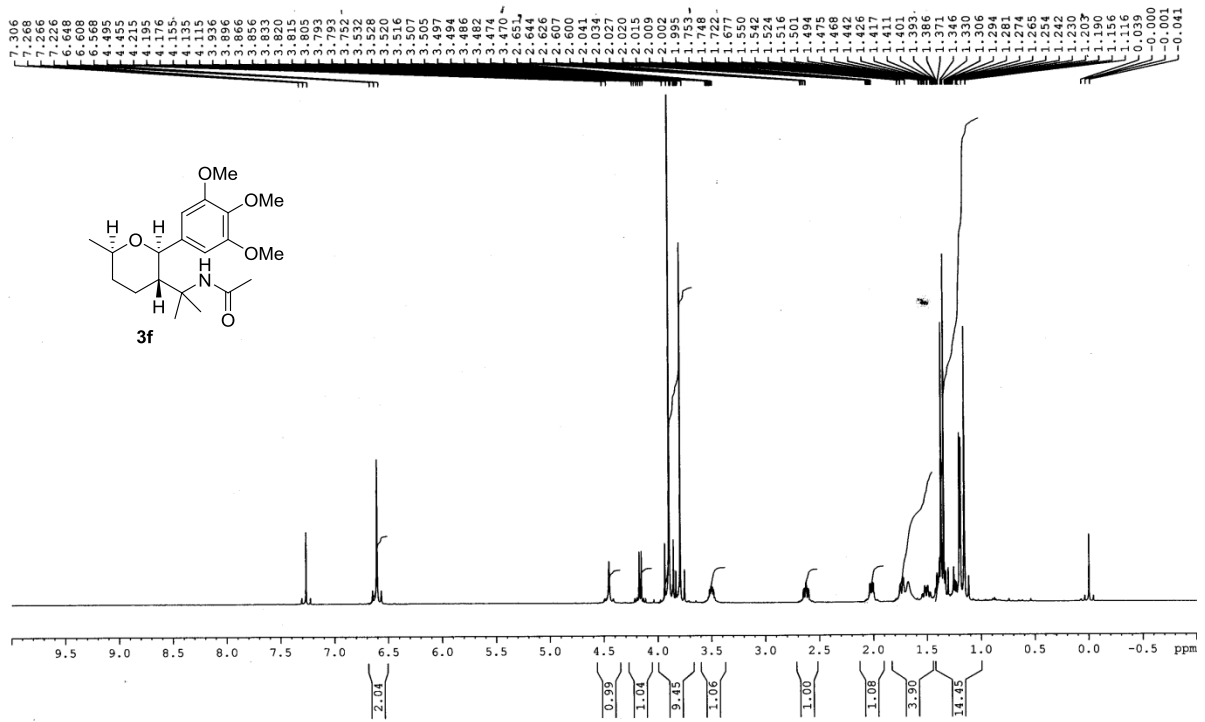

NH-3,4,5-OMe  
6448

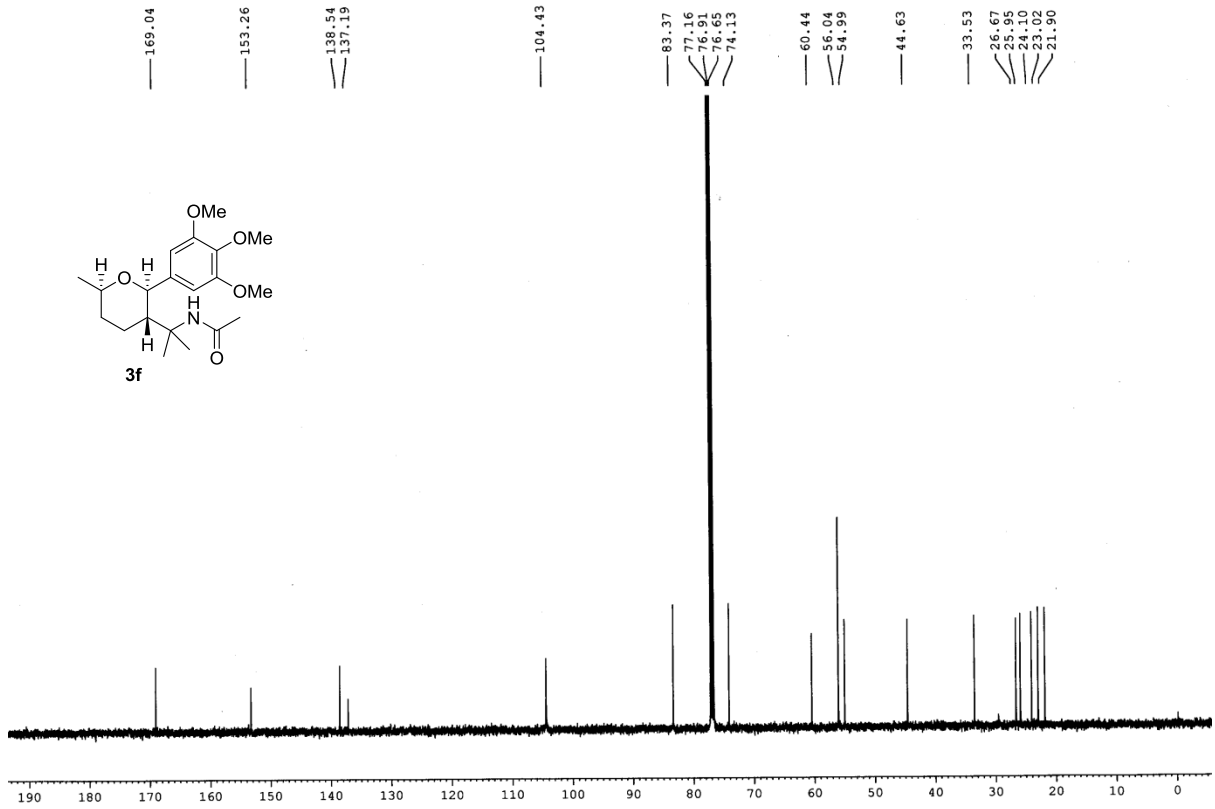

BN-NH-Pi  
4785

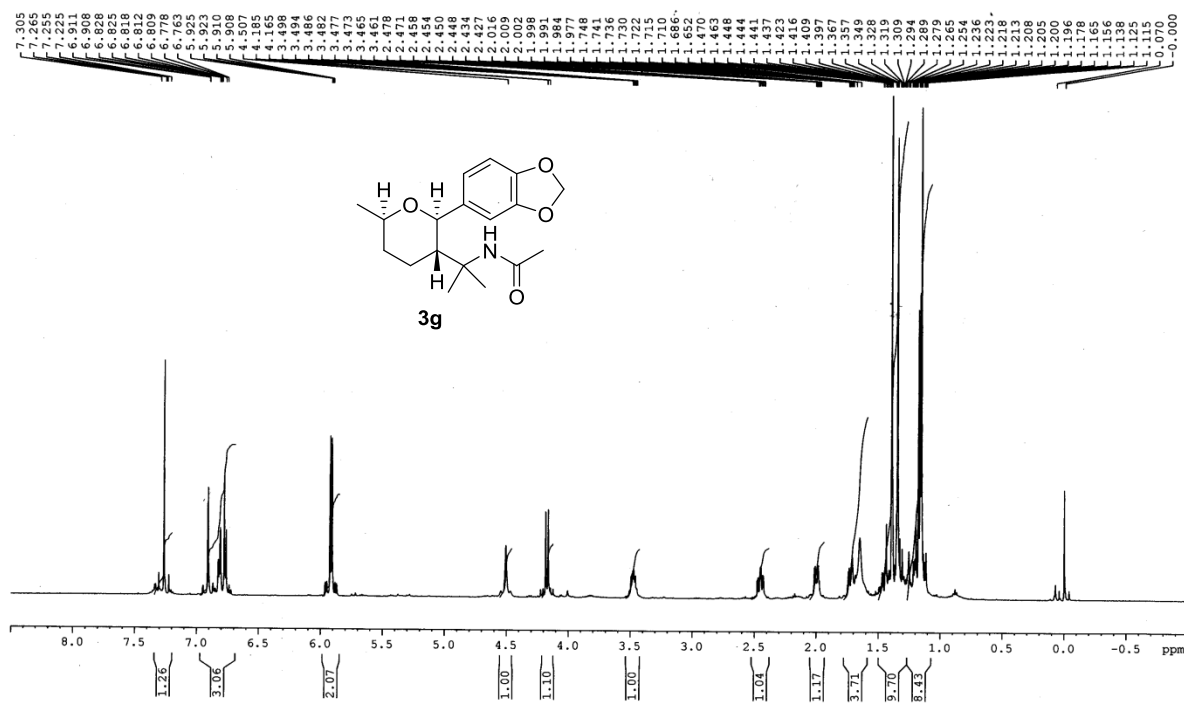

Name of Sample: NH-Pi  
Spectrum No : 4743

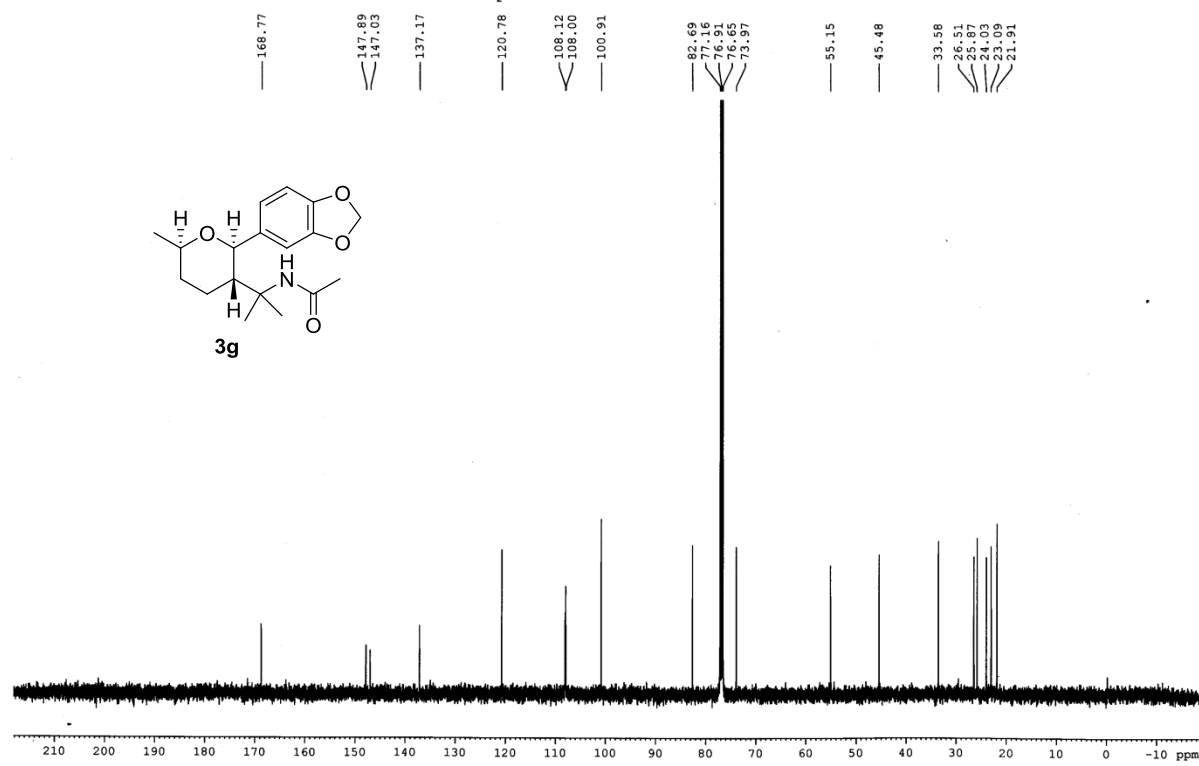



Name of Sample:Nh-Benyloxy  
Spectrum No :6075

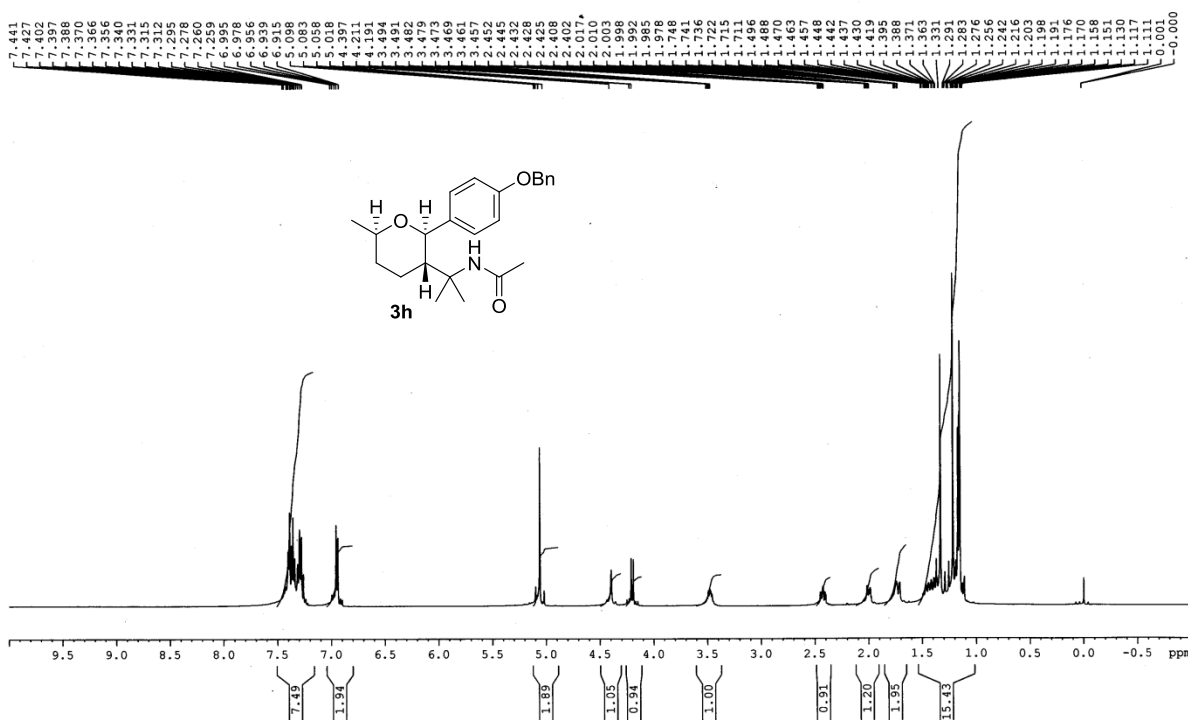

Name of Sample:NH-Benyloxy  
Spectrum No :6076

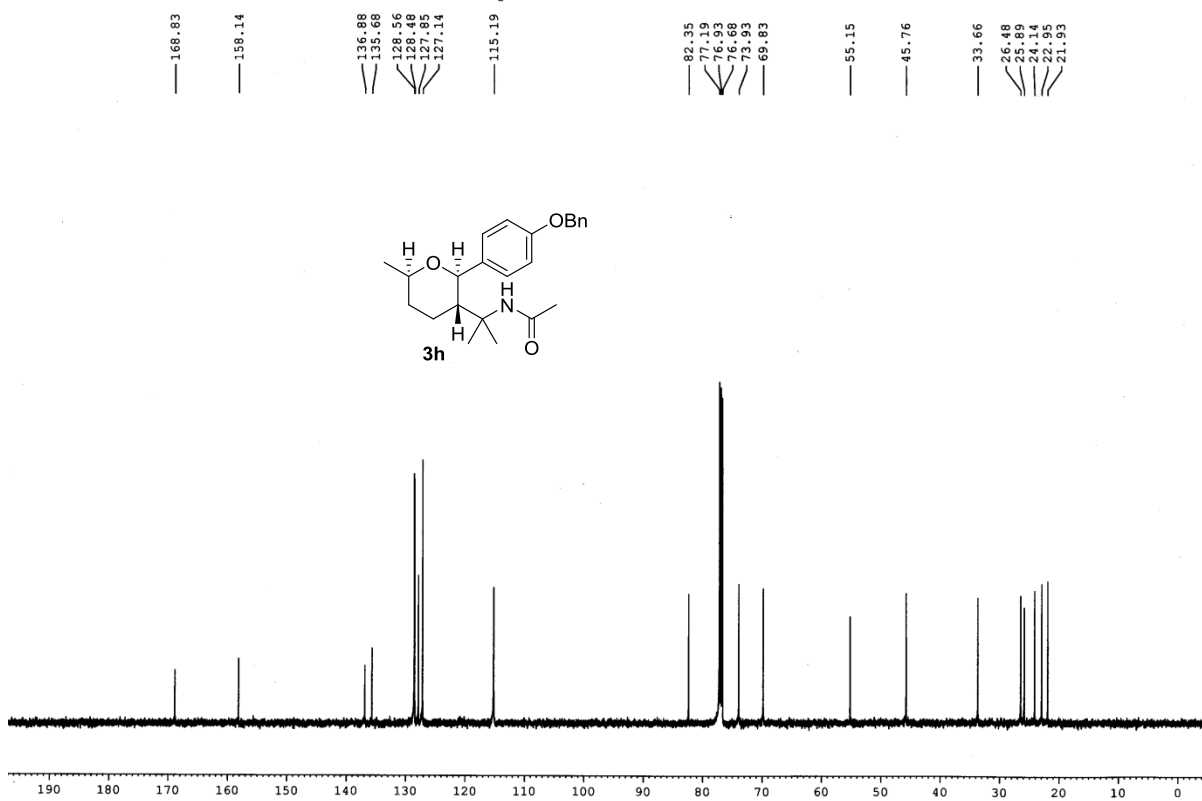

Name of Sample: NH-isopropyl-benzal  
Spectrum No :4683

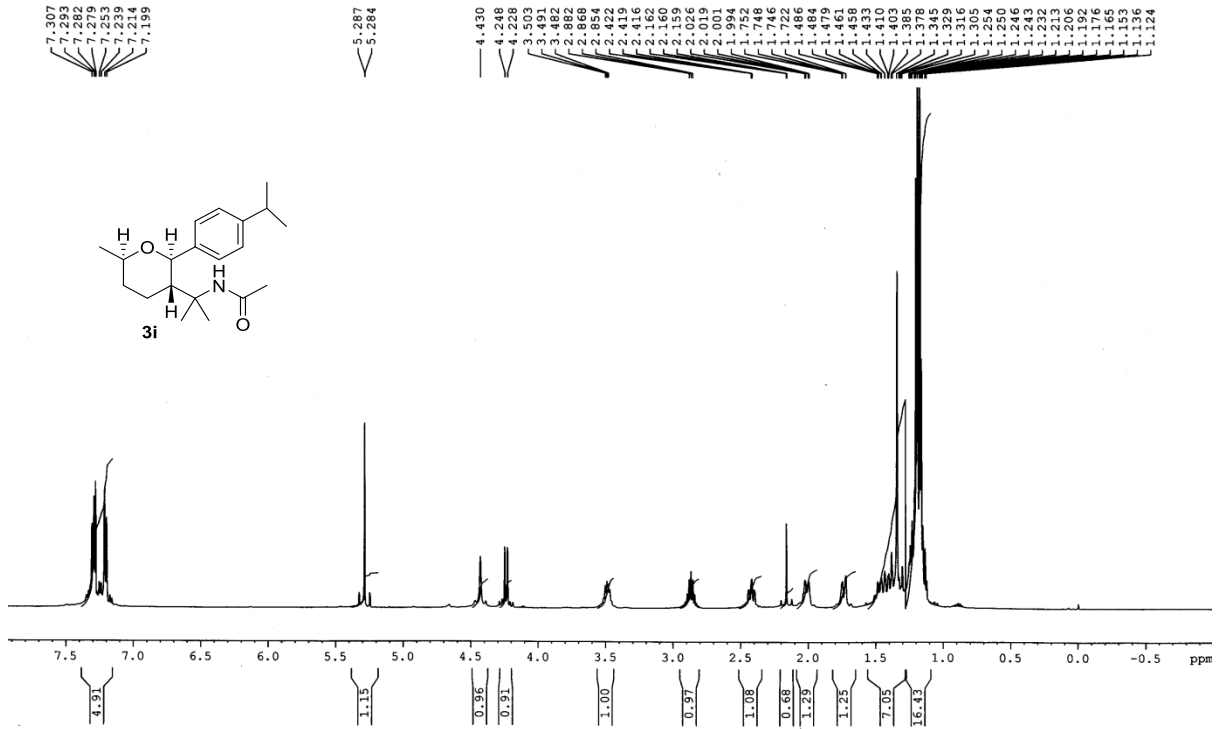

Name of Sample: NH-iso  
Spectrum No :4584

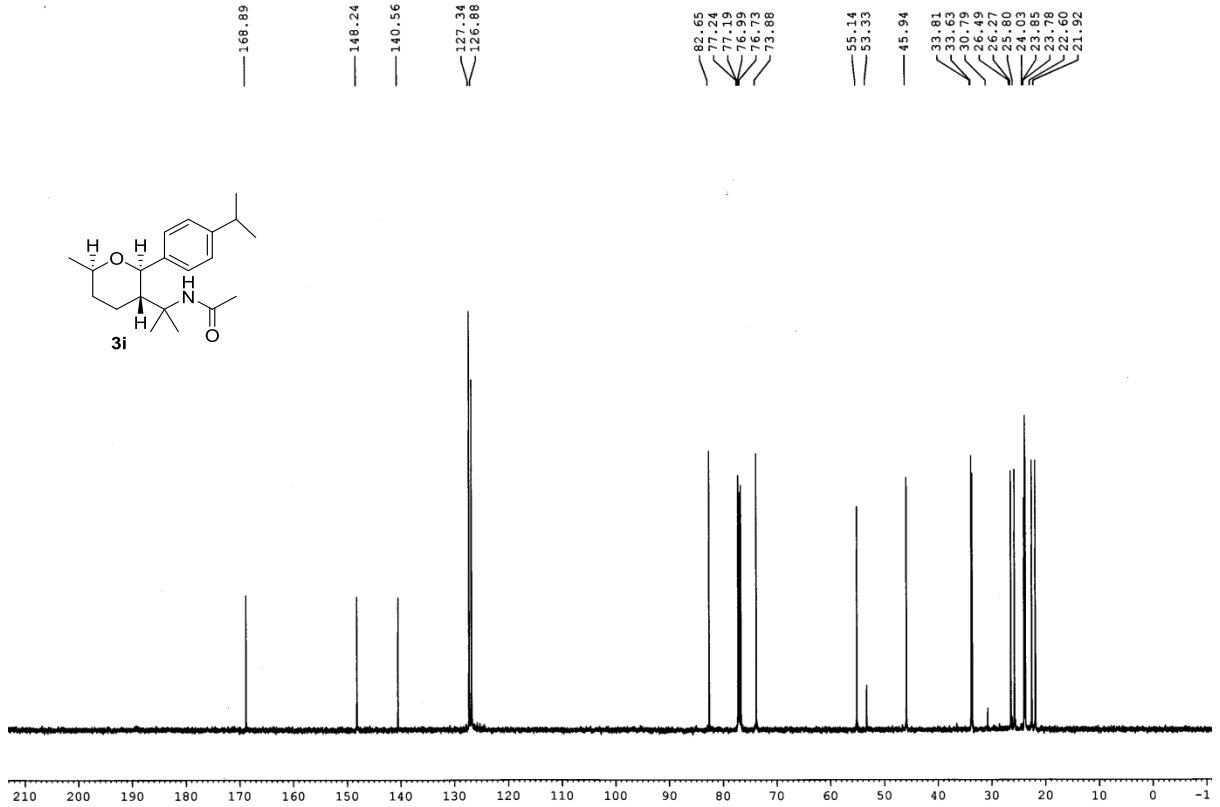

BR-pipero  
6449

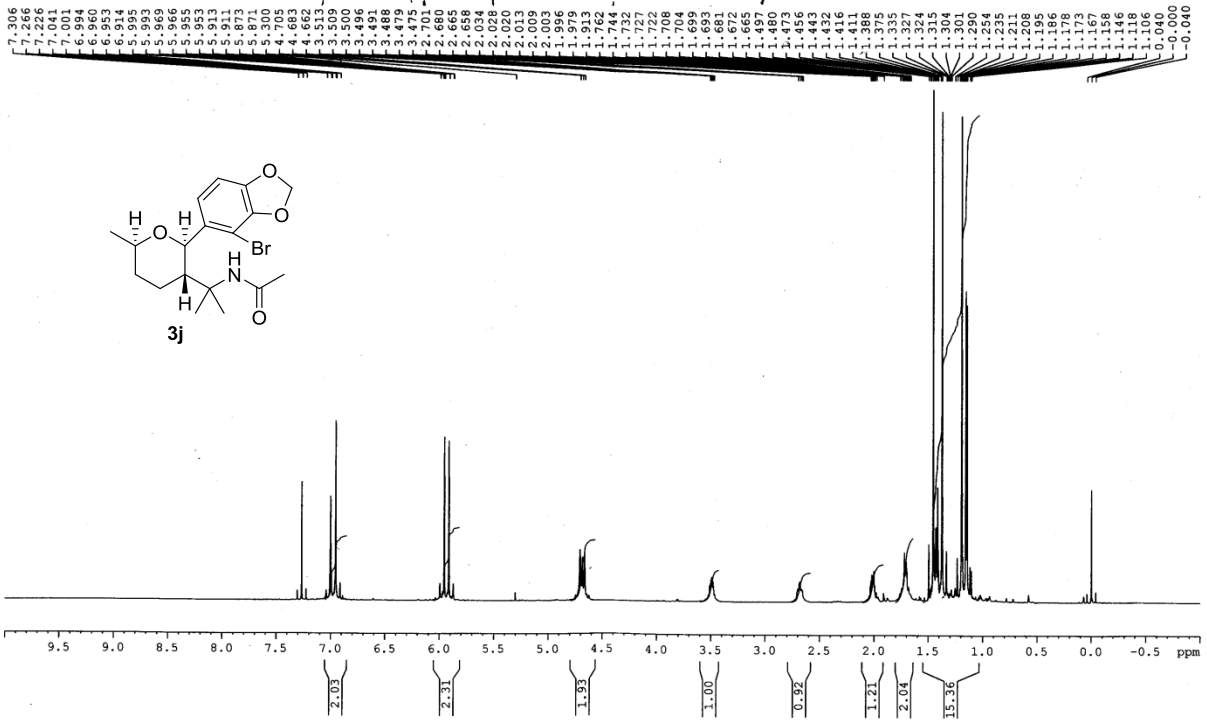

6450  
Brpipero

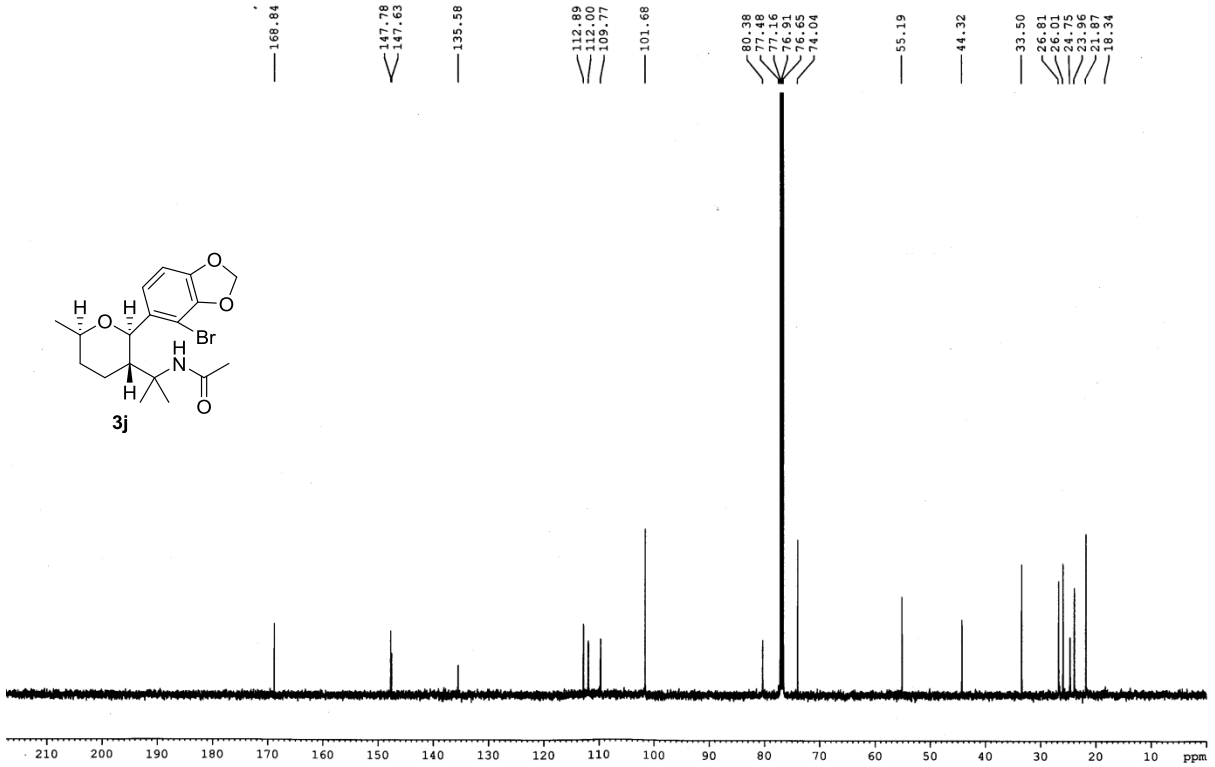

5920  
NH-P-Cl

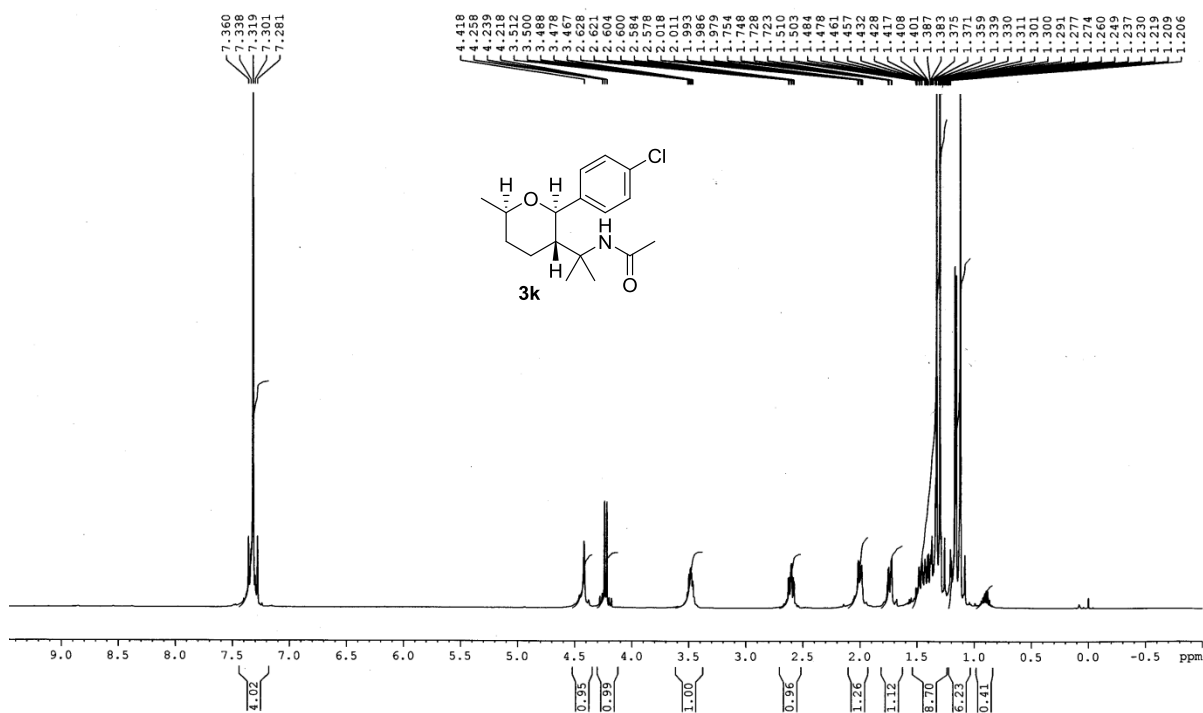

5921  
NH-P-Cl

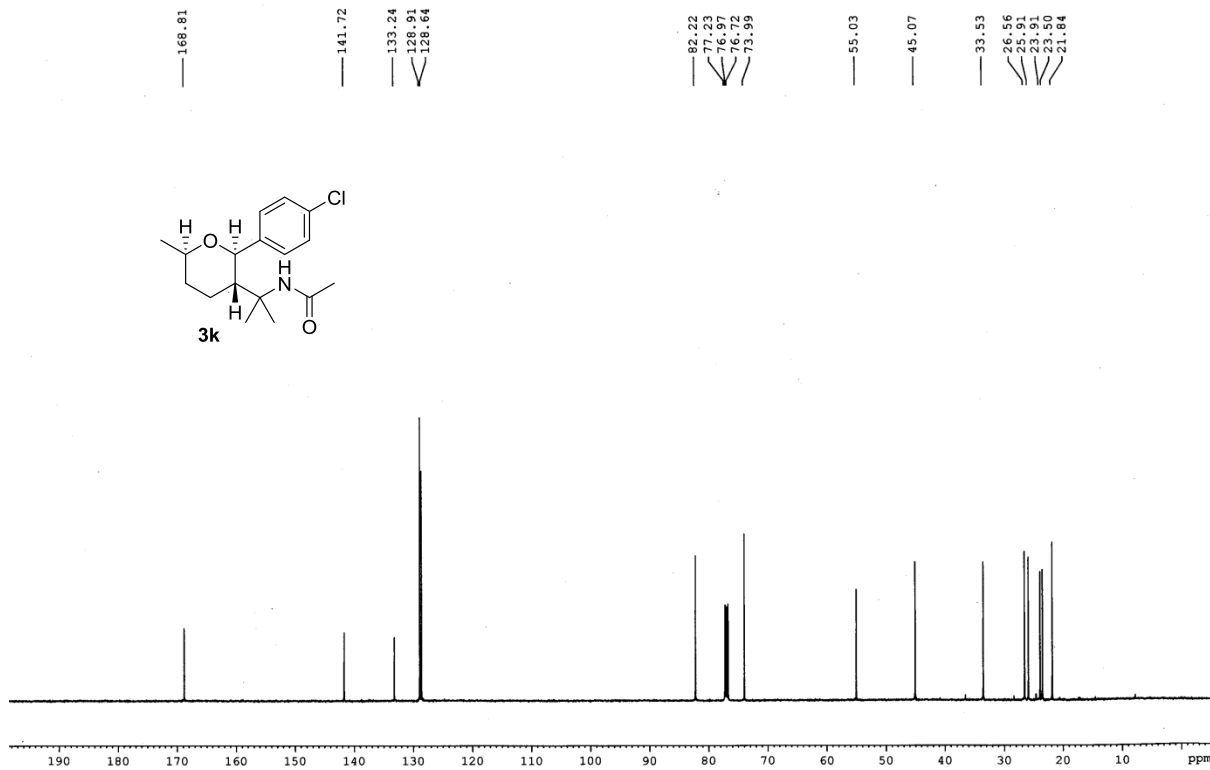

6073  
NH-2Cl

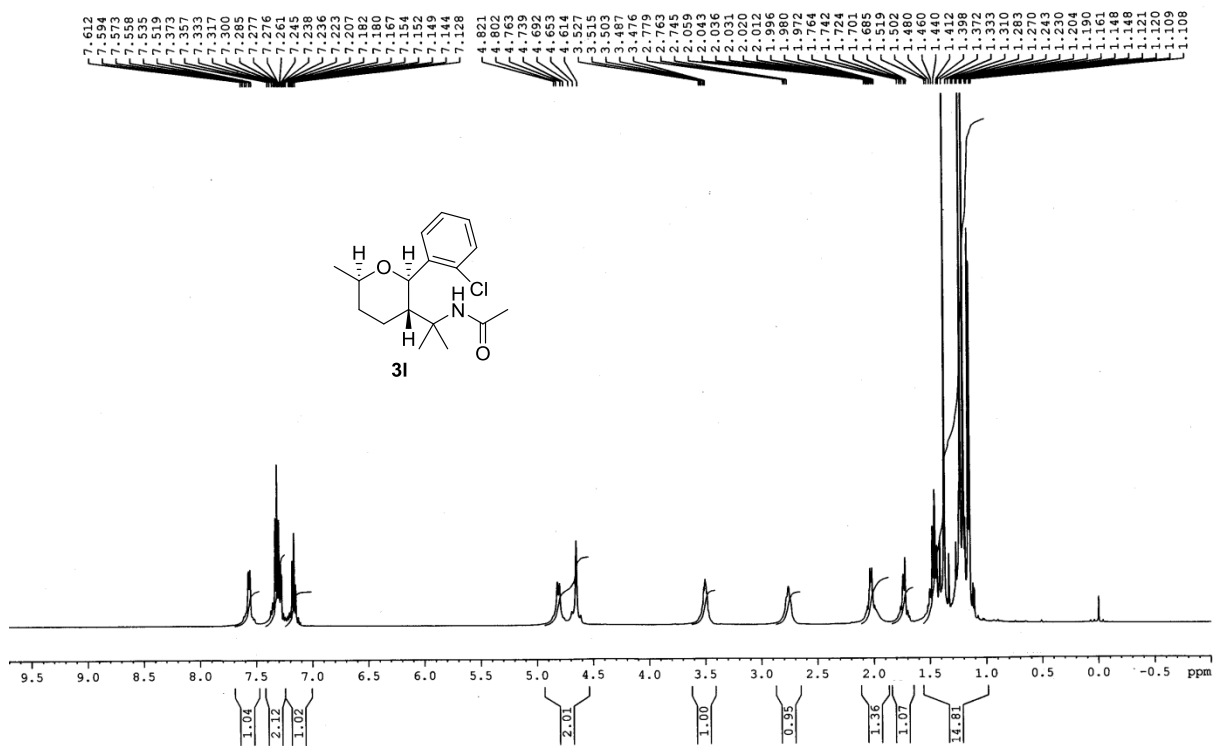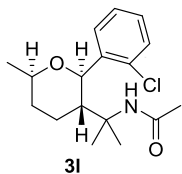

Name of Sample: NH-2-Cl  
Spectrum No : 6074

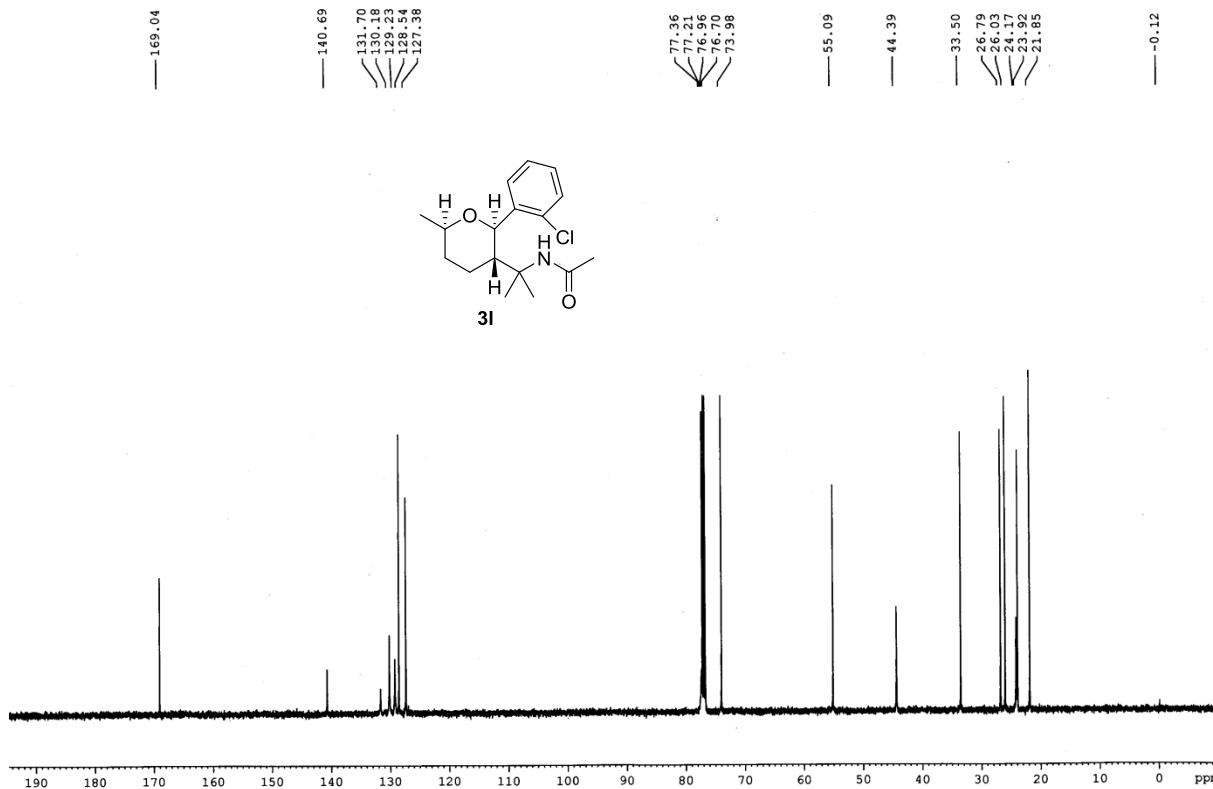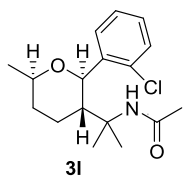

Name of Sample: 3-4 diCl  
Spectrum No : 6445

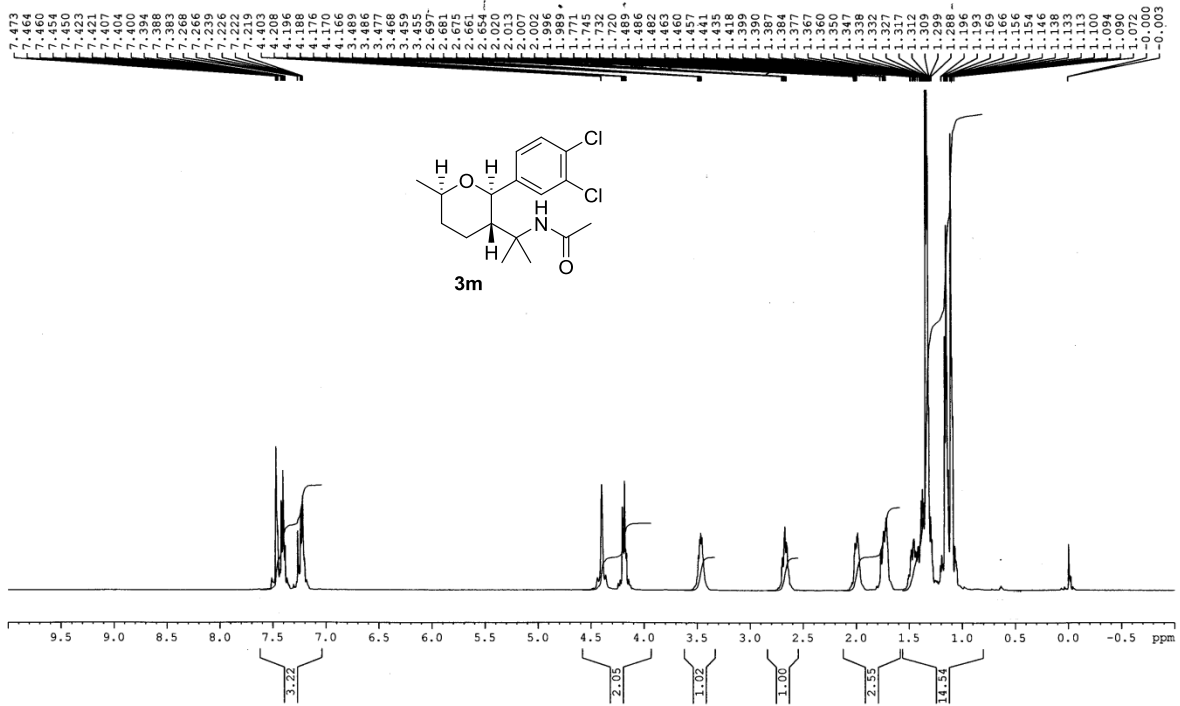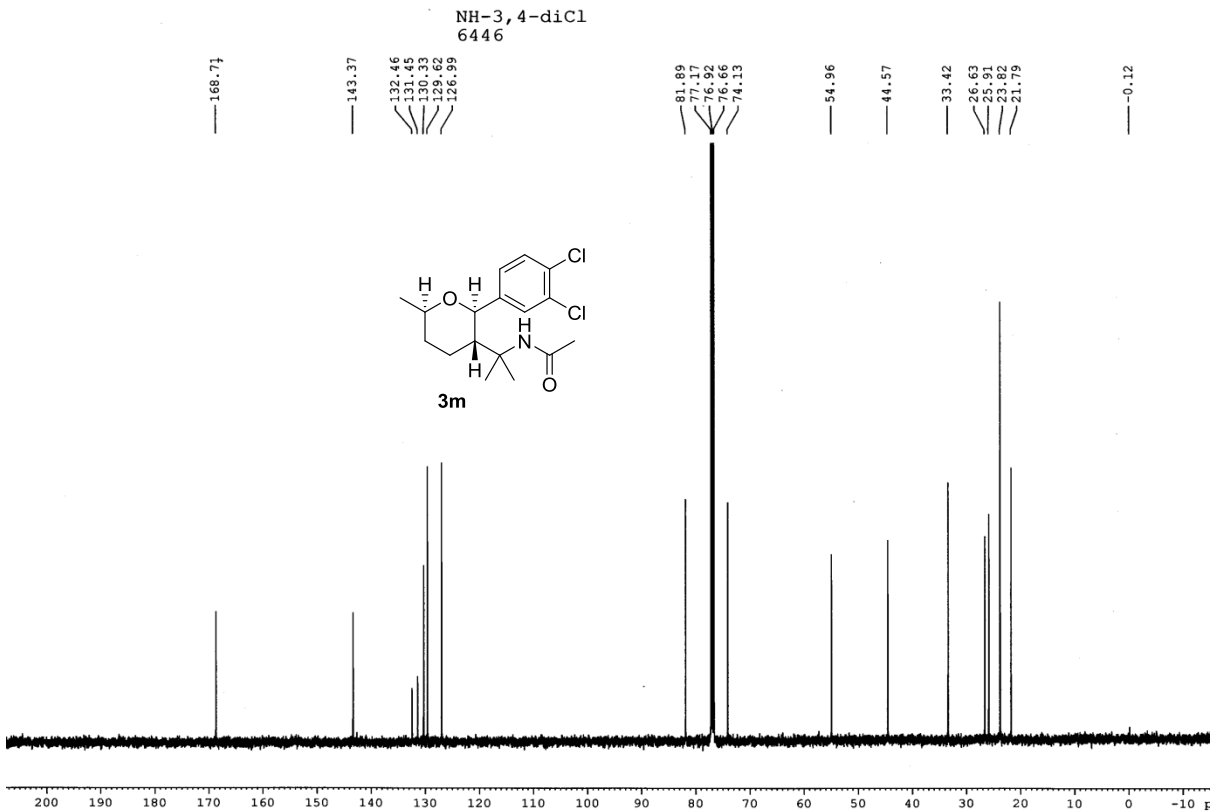

NH-2-Br  
6831

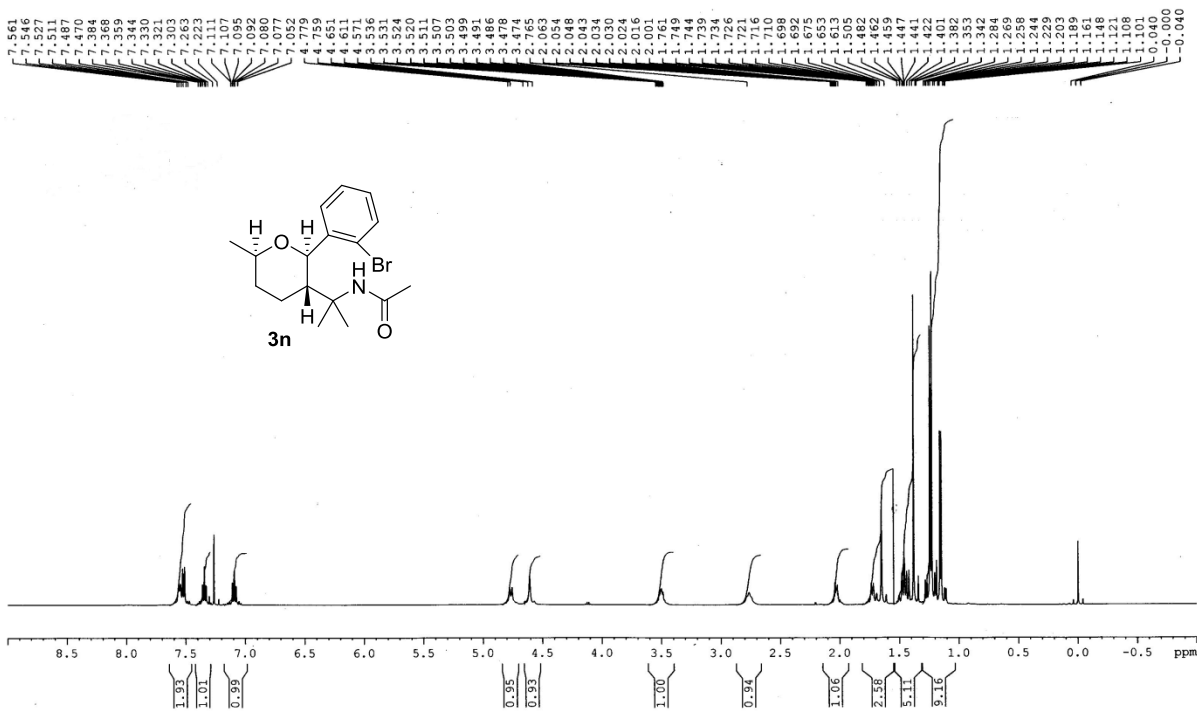

NH-2-Br  
6832

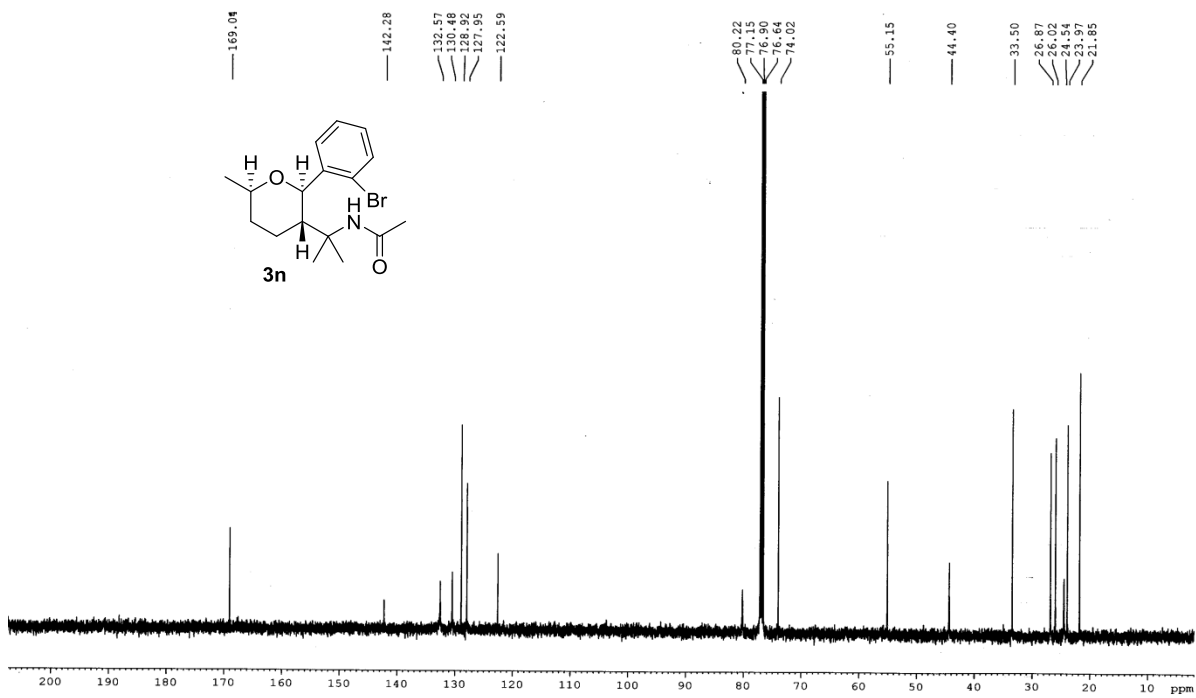

NH-m-NO2  
6840

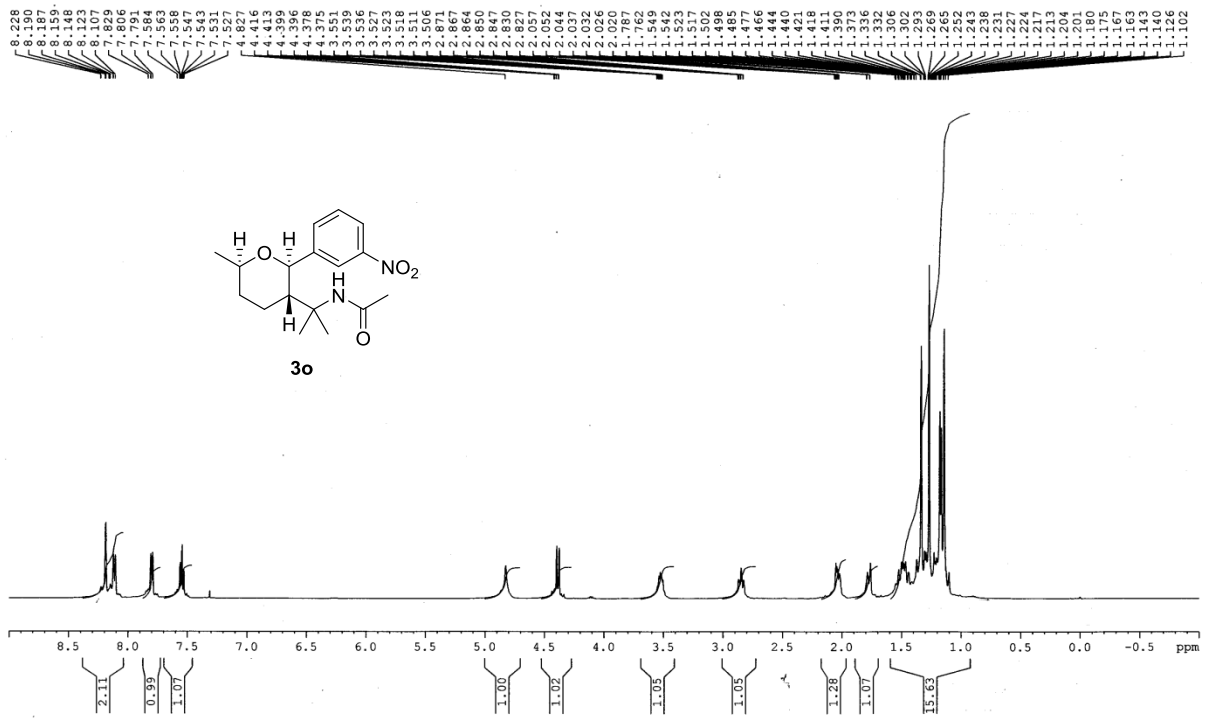

NH-m-NO2  
6841

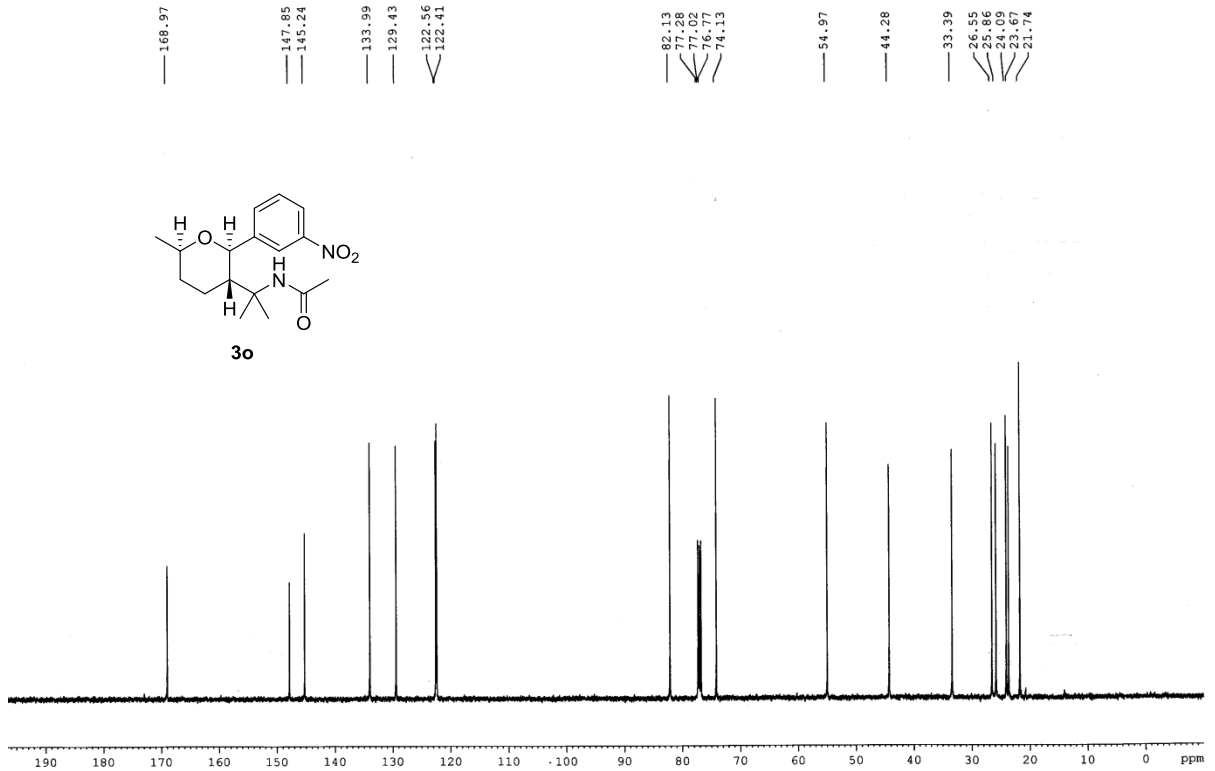



NH-AllylCN  
6829

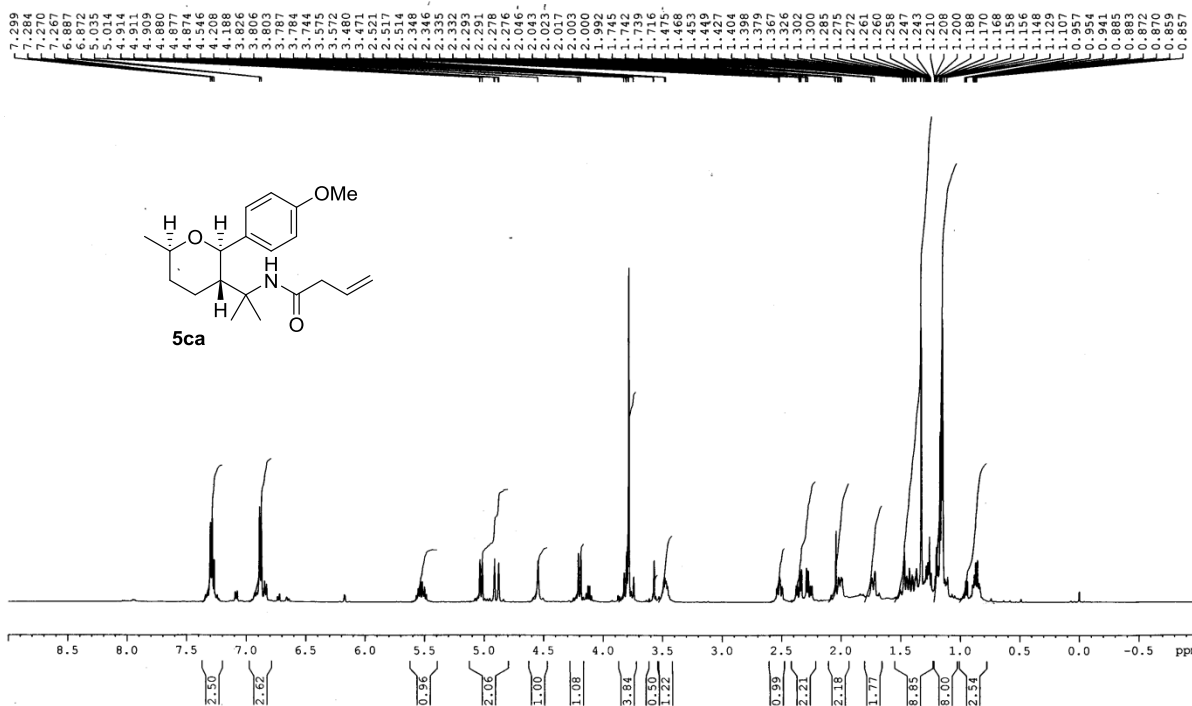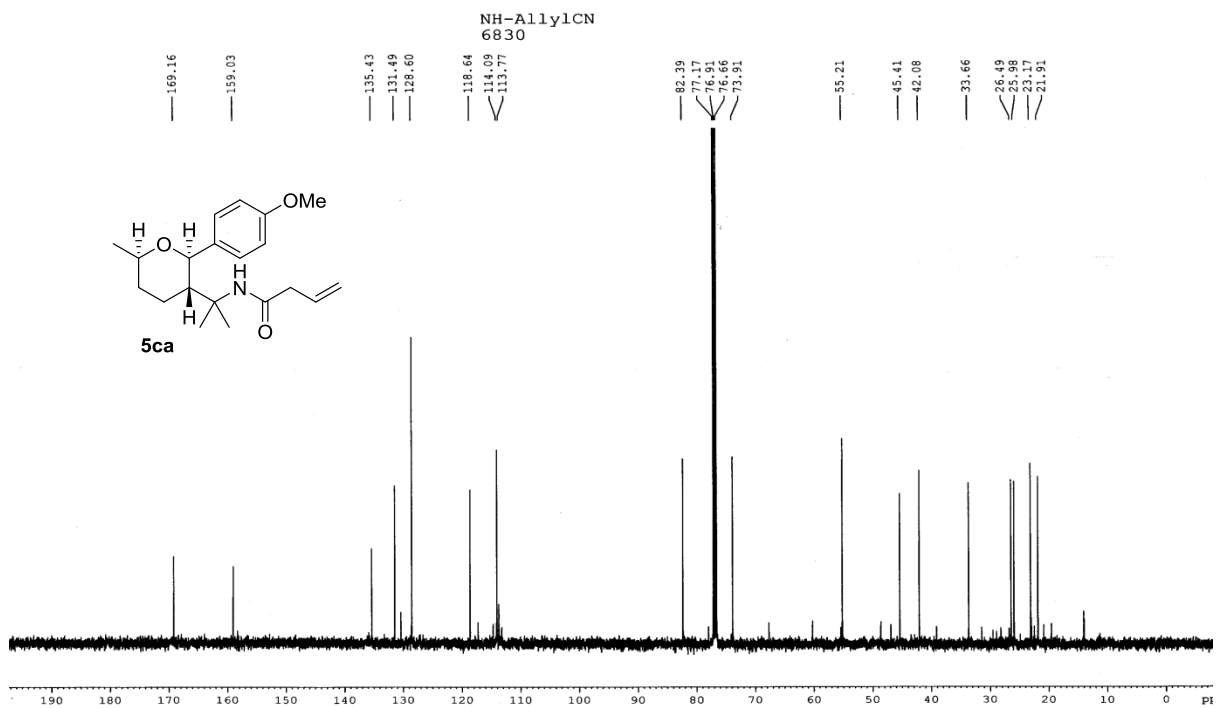

NH-allylnitrile-p-tolualdehyde  
8064

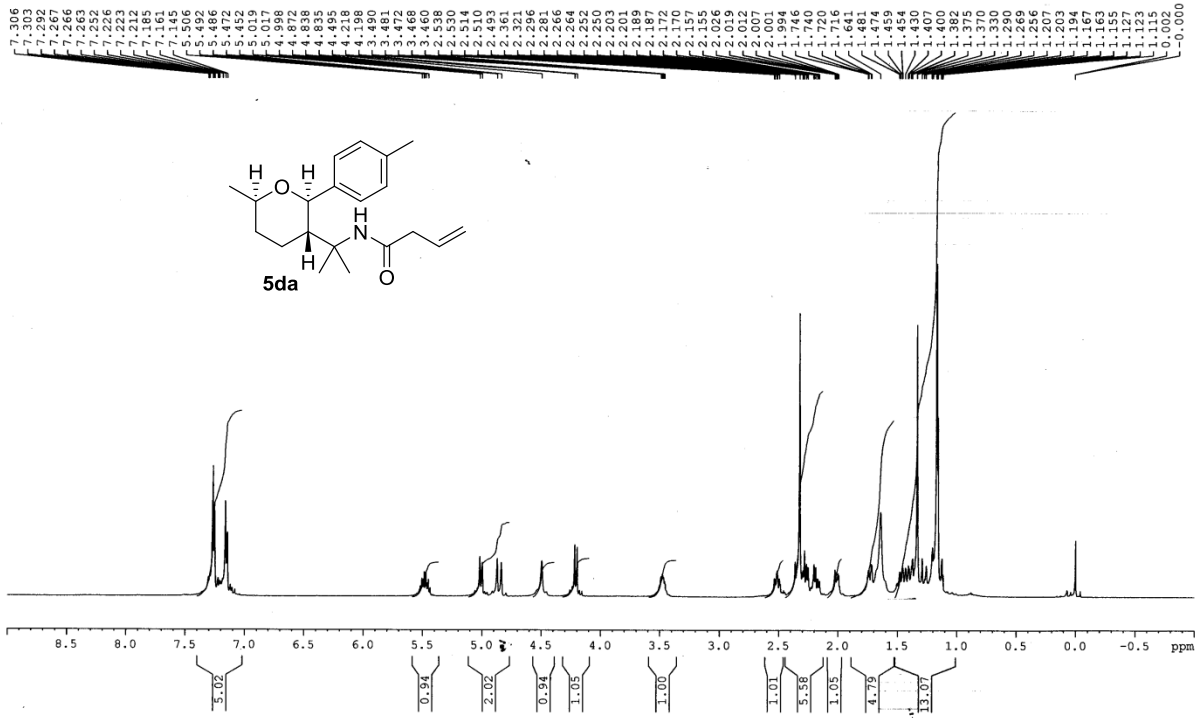

NH-allylnitrile-p-tolu  
8065

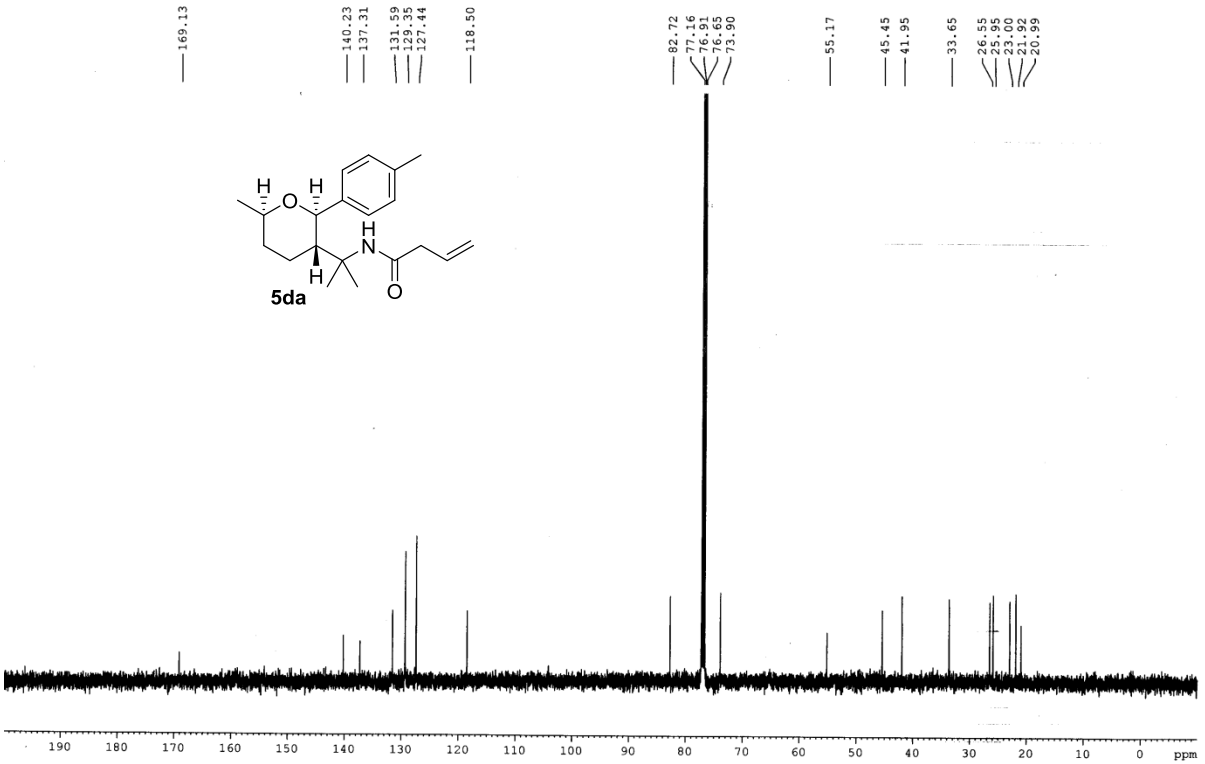

NH-Ritter-isopropyl-propionitrile  
9701

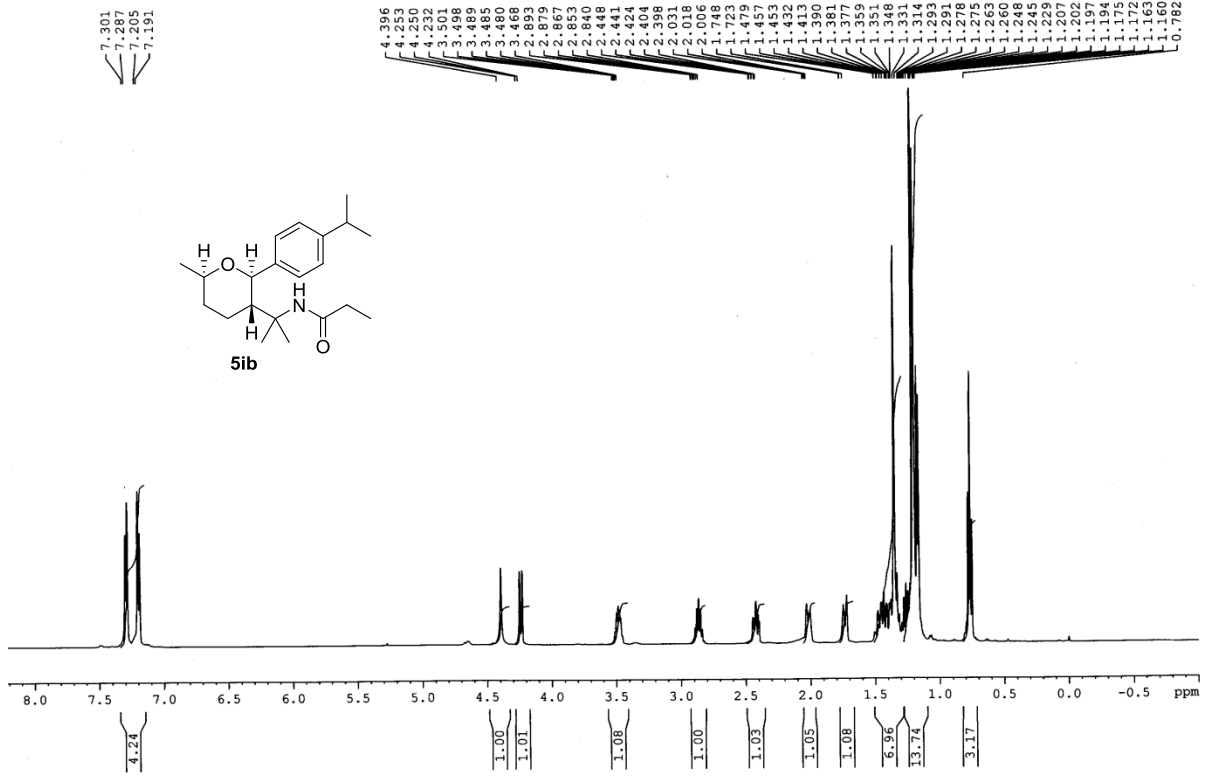

NH-Ritter-isopropyl-propionitrile  
9702

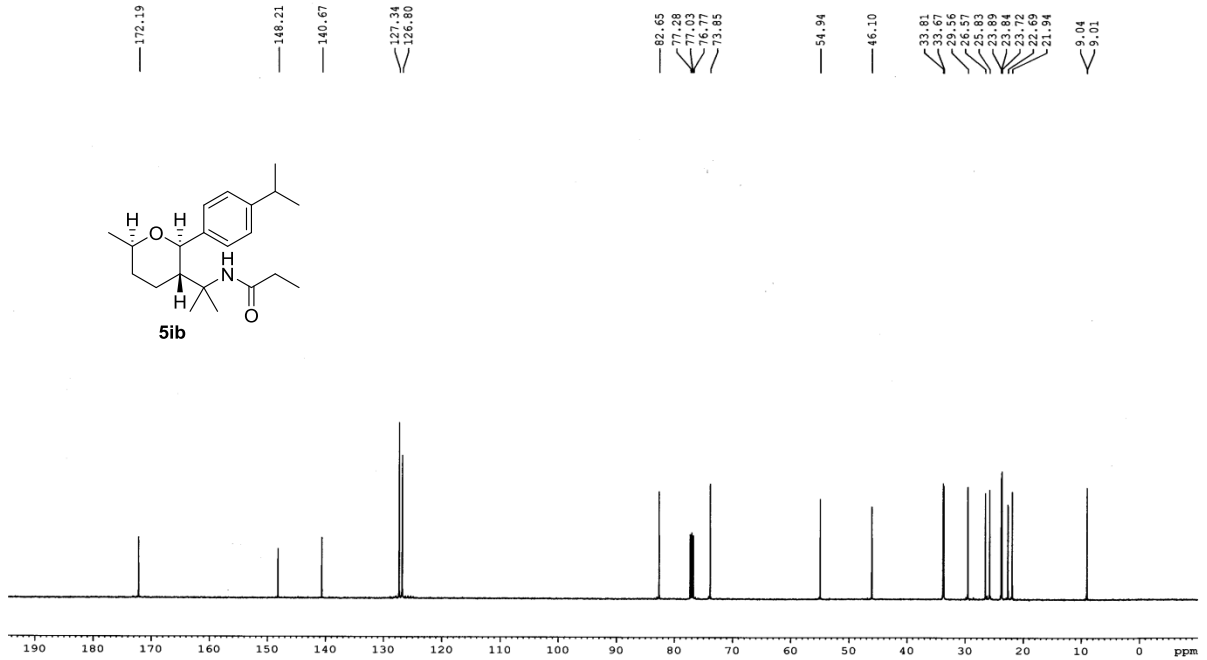

Name of Sample: NIT-659-26-02  
Spectrum No.: 8625

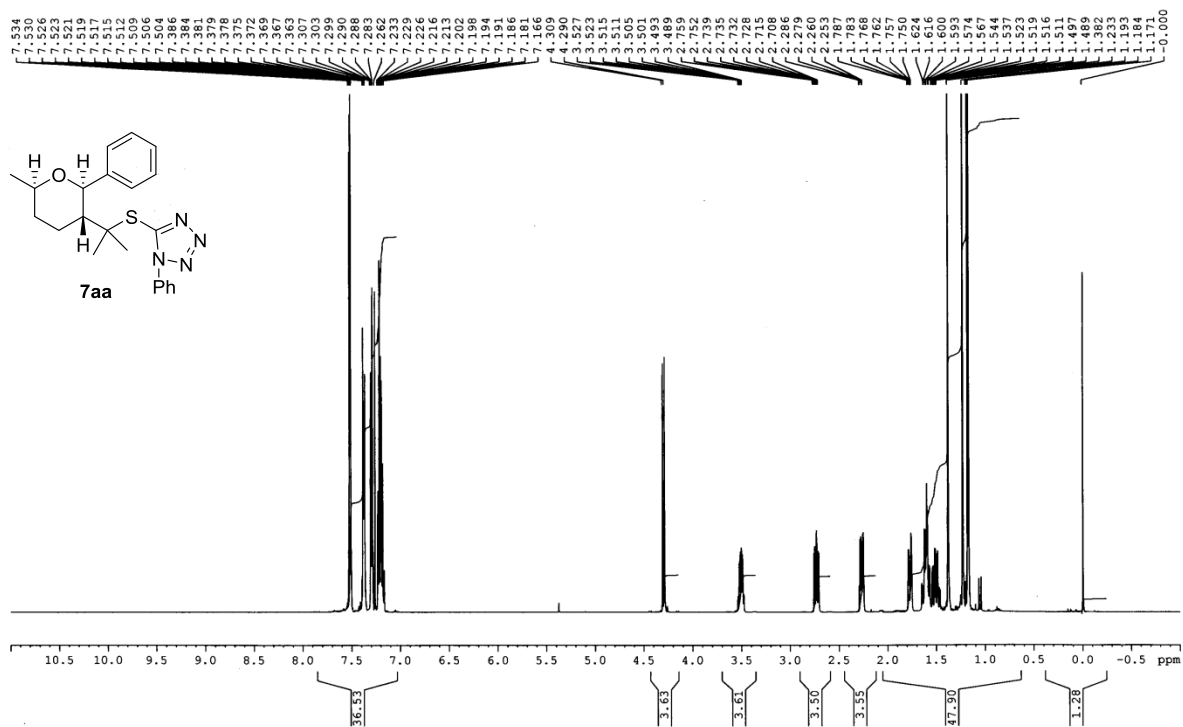

Name of Sample: NH-Thio  
Spectrum No.: 8673

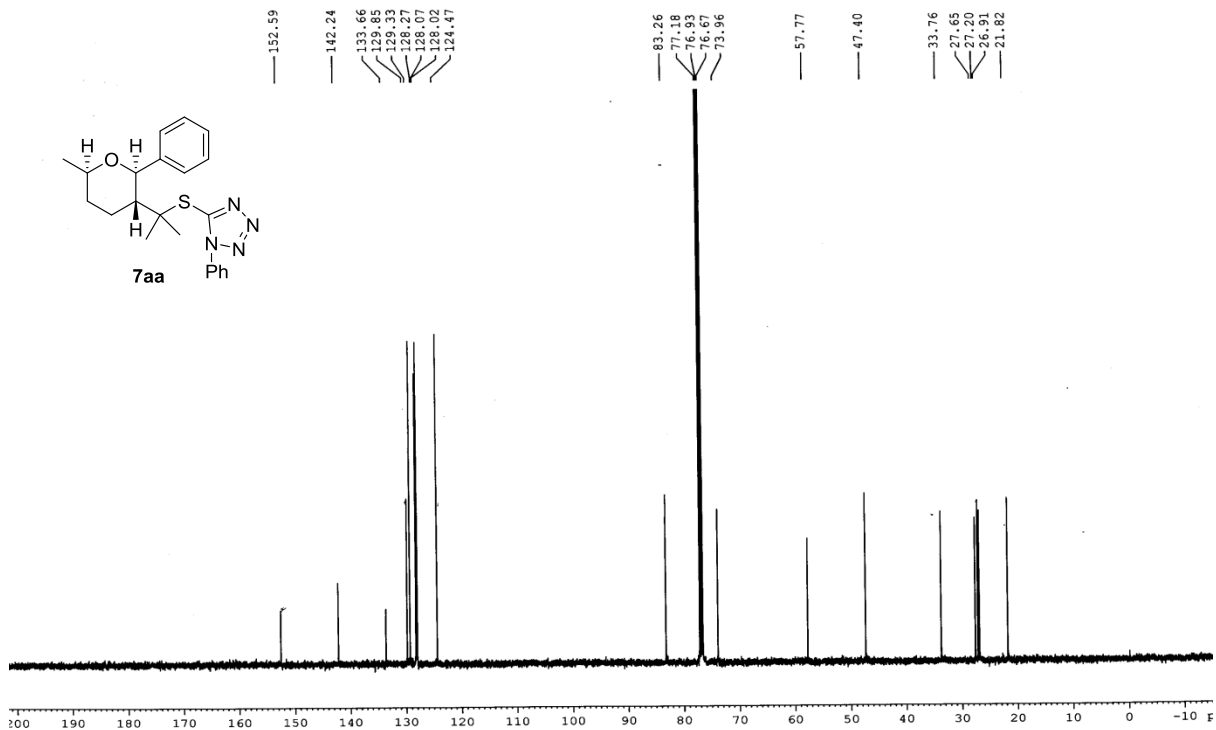

Name of Sample: NH-TNAPH  
Spectrum No : 8710

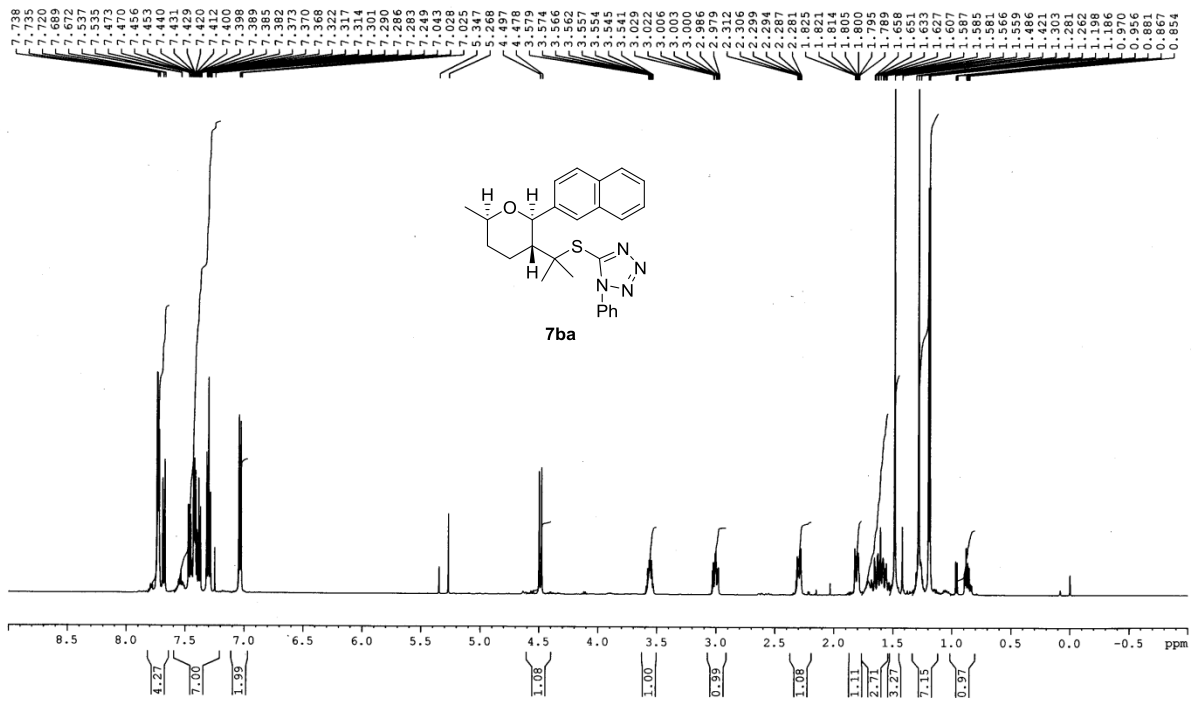

Name of Sample: NH-TNAP  
Spectrum No.: 8769

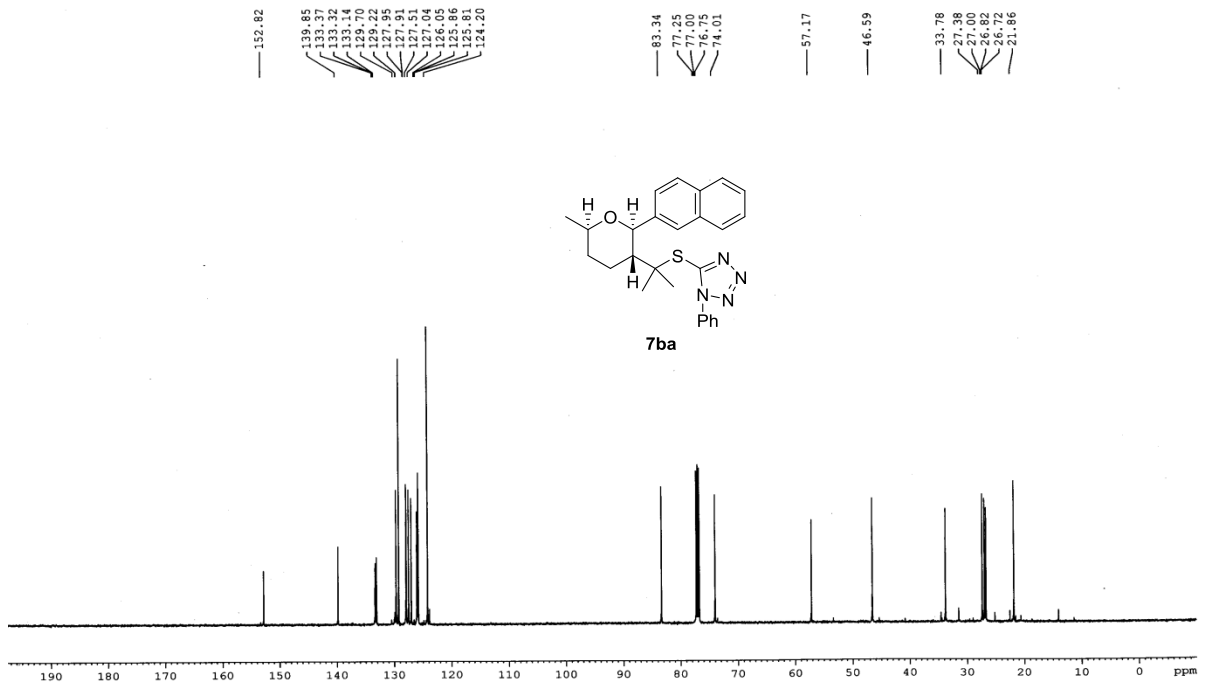

NH-Thiol-Anisalde  
6938

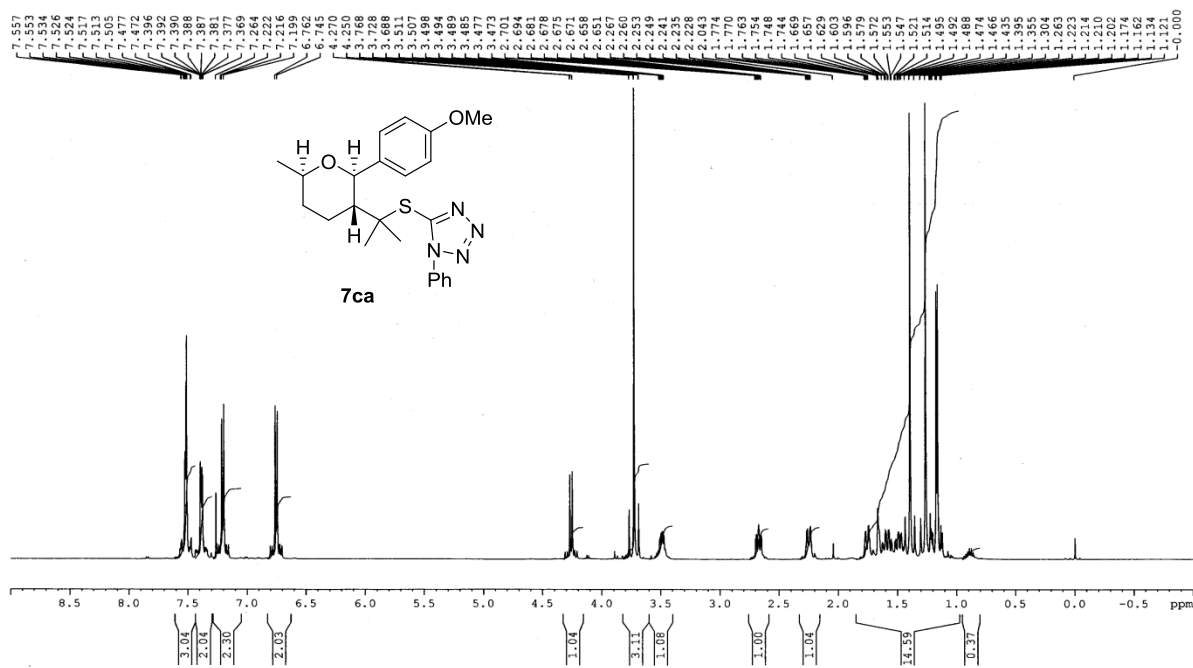

NH-Thiol-anisalde  
6939

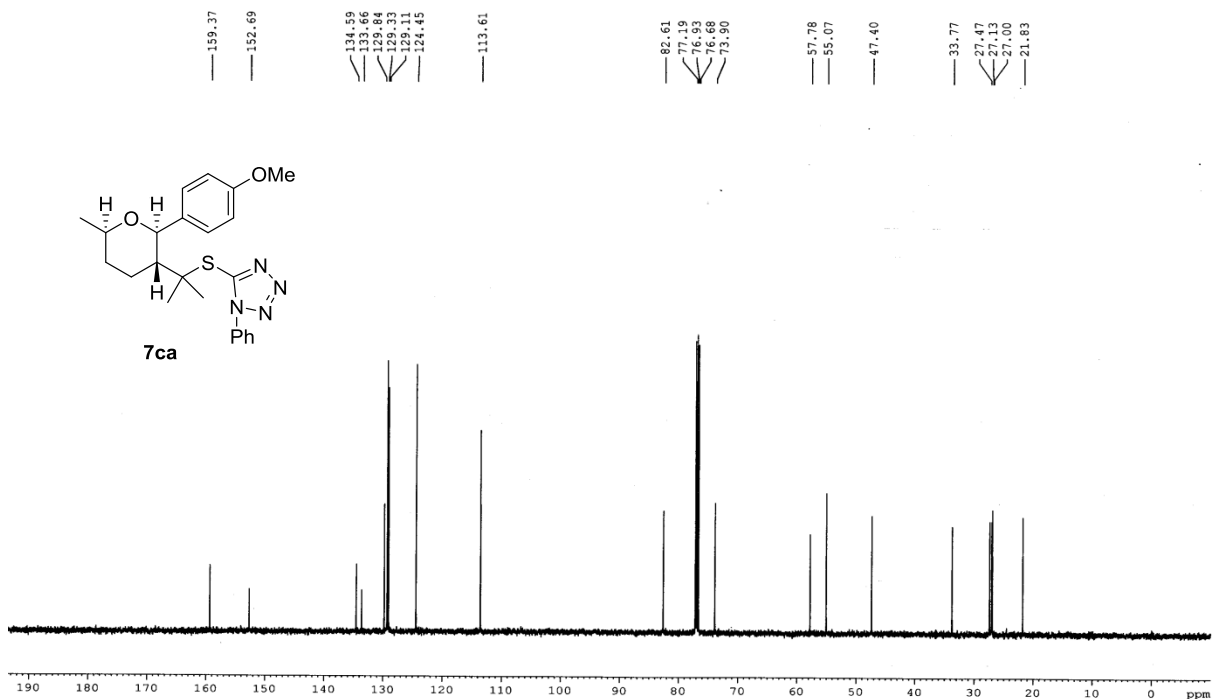

Sample Name: NH-tolu-thiol  
Spectrum No.: 8751

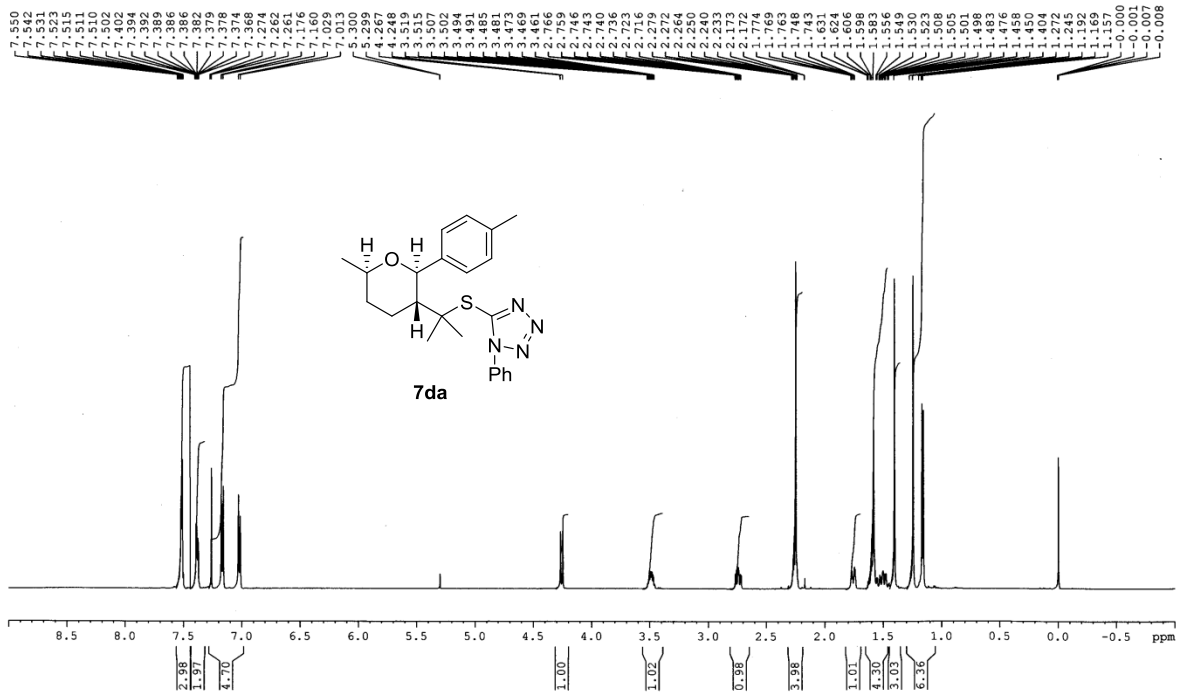

Name of Sample: NH-tolu-thi  
Spectrum No.: 8752

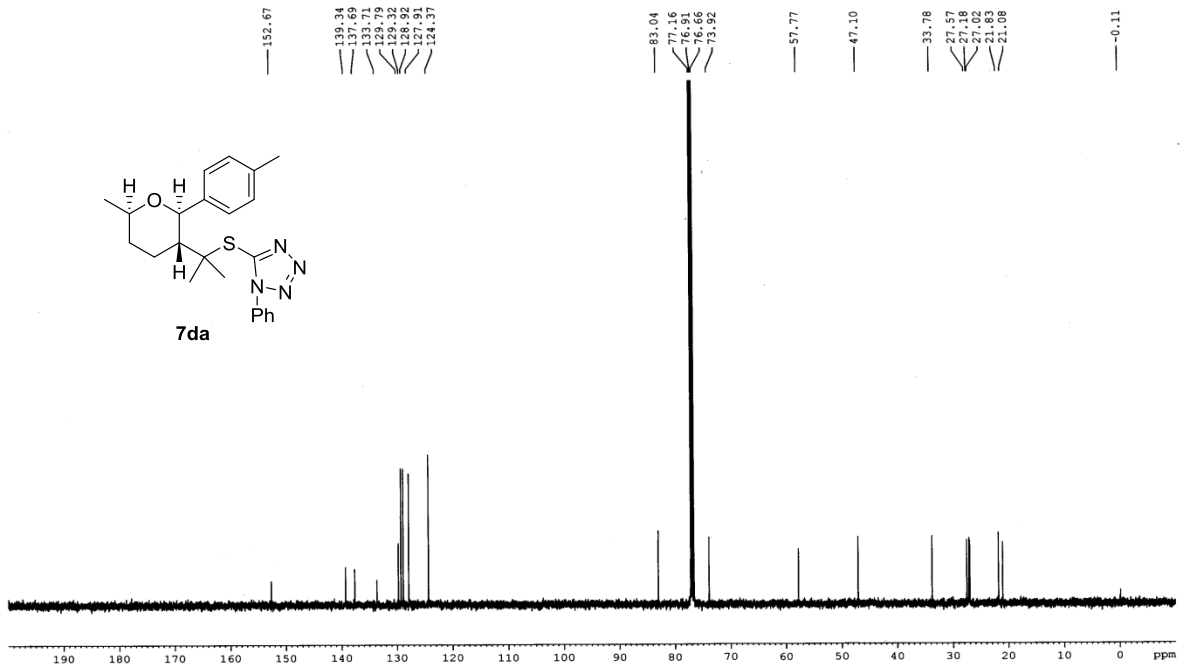

Name of Sample: NH-TPOH  
Spectrum No : 8709

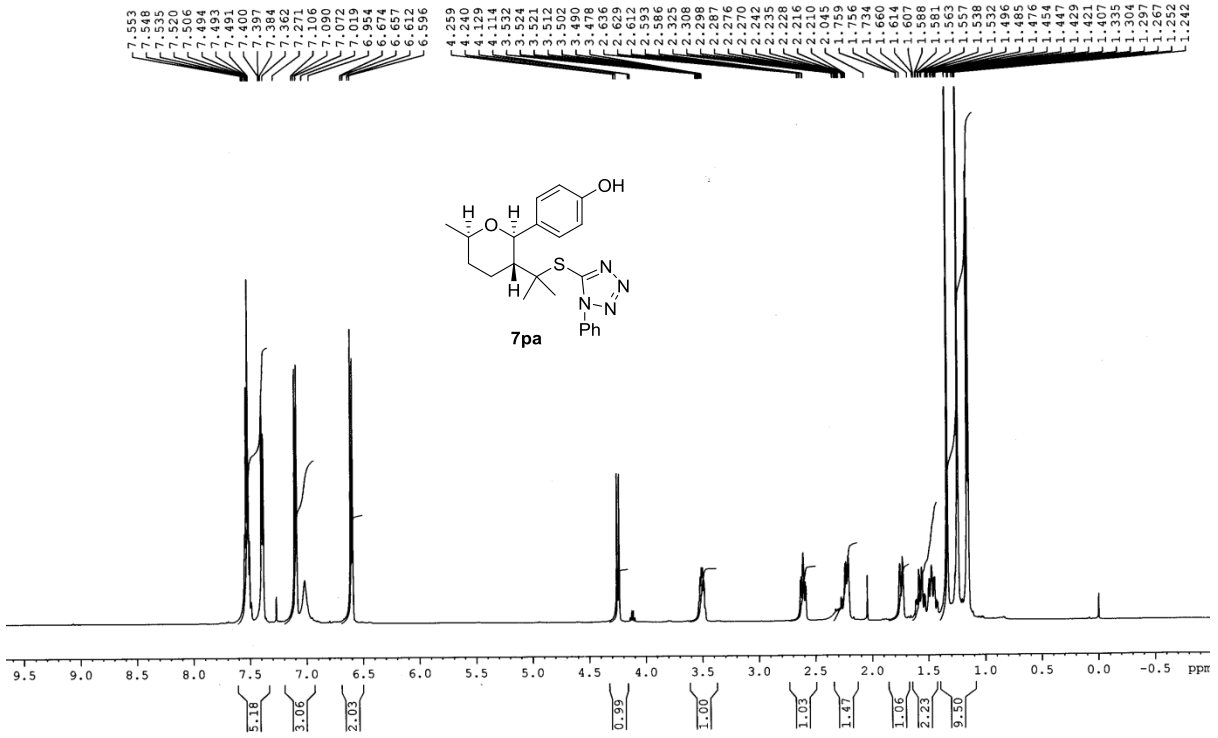

Name of Sample: NH-TPOH  
Spectrum No.: 8768

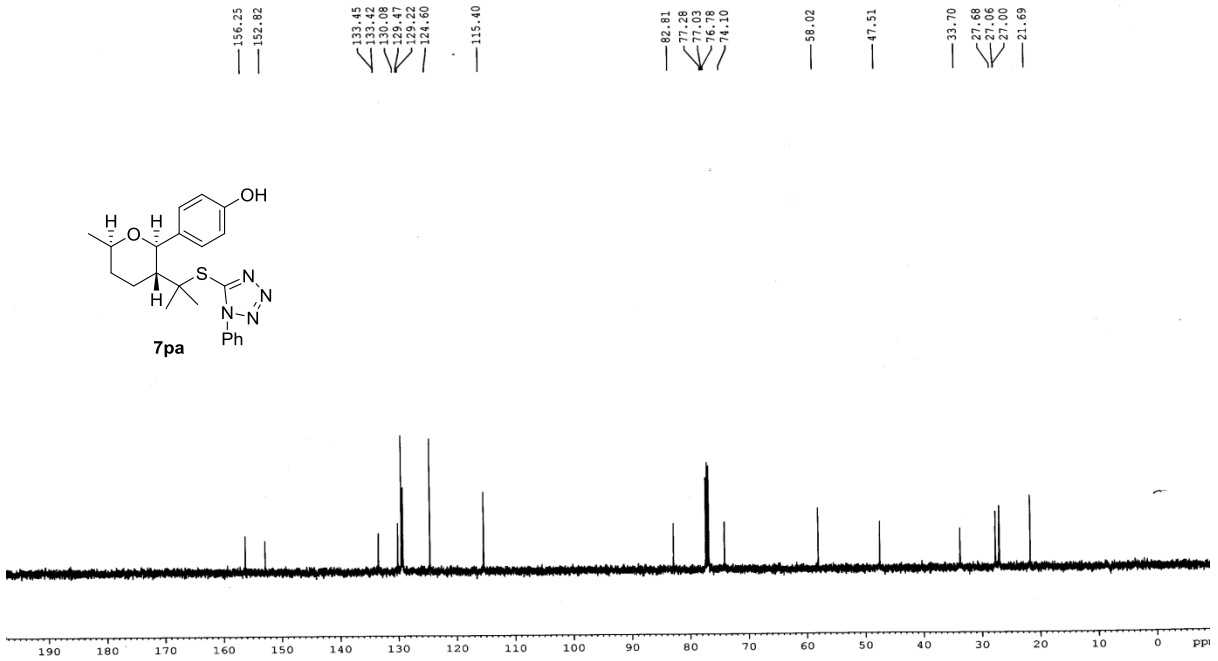



Name of Sample: NS11  
Spectrum No : 8937

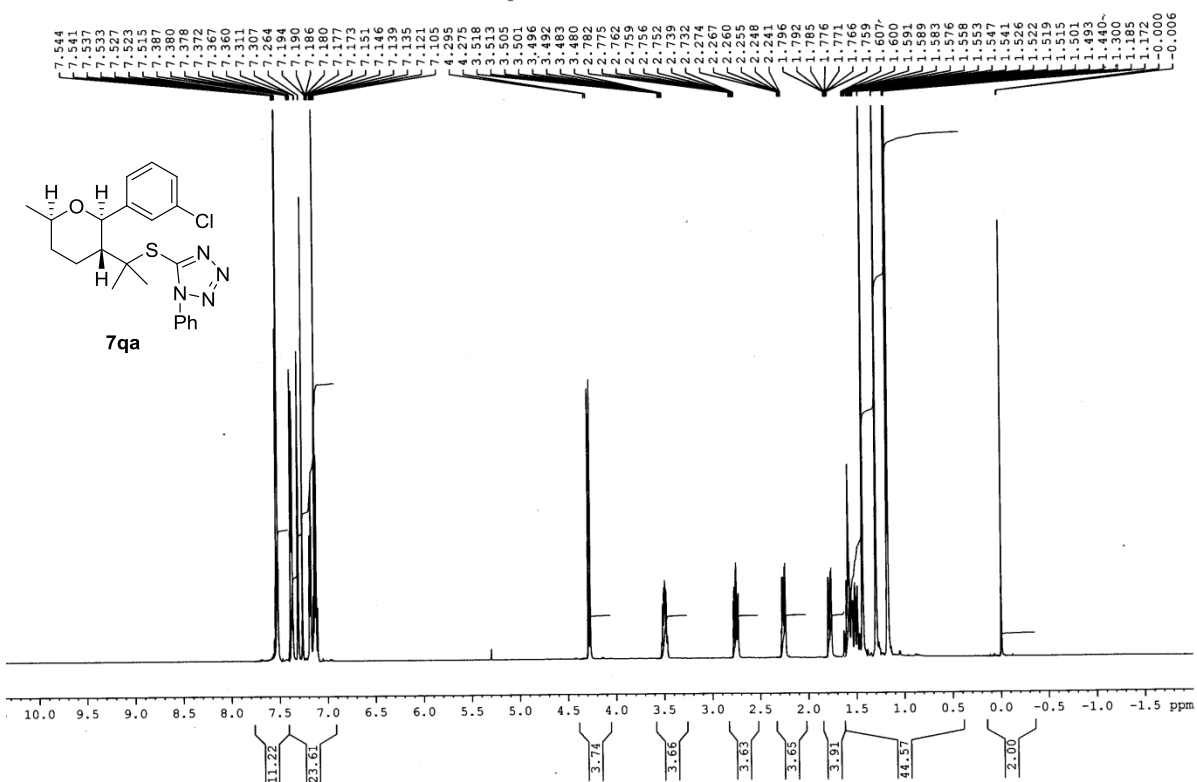

Name of Sample: NH-11  
Spectrum No : 8952

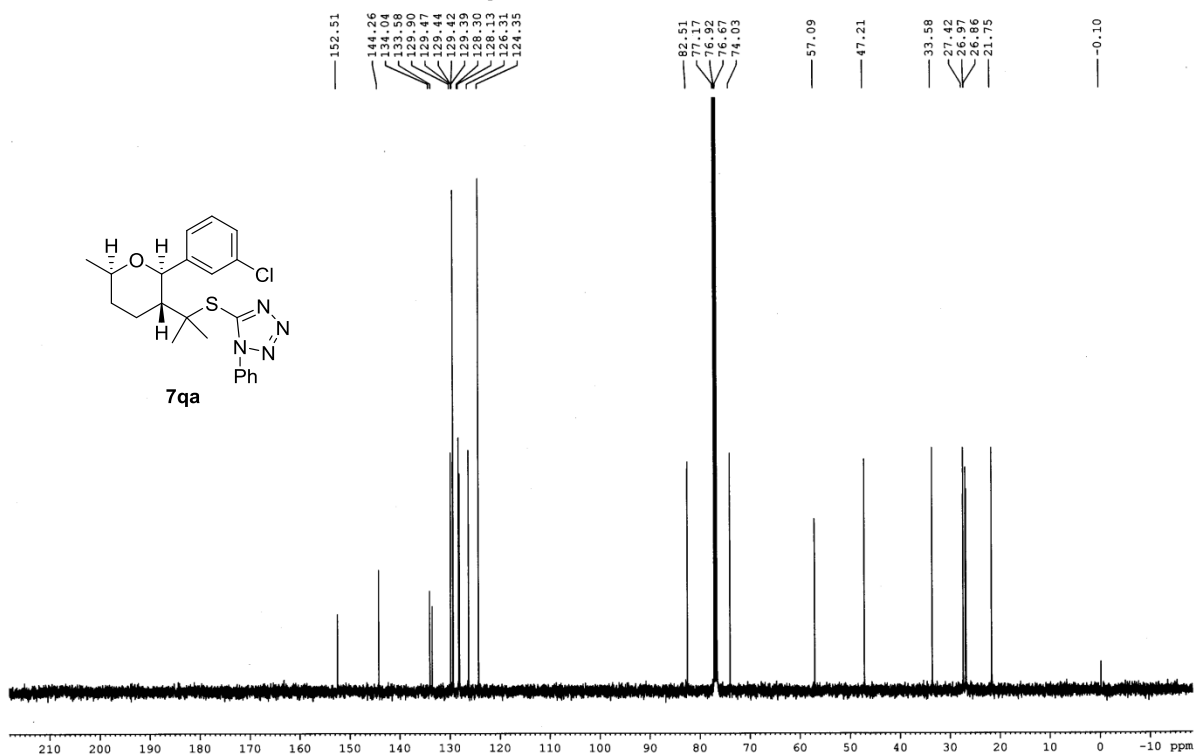

Name of Sample: NS-12  
Spectrum No : 9181

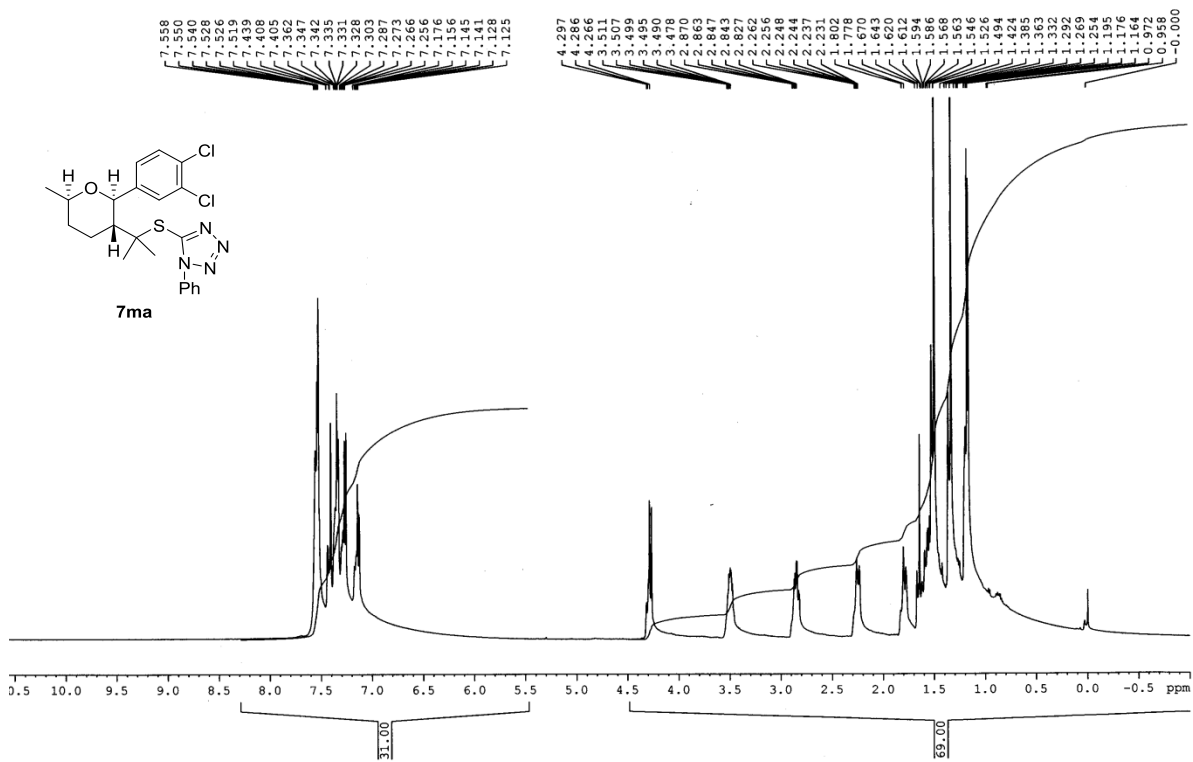

Name of Sample: NH-12  
Spectrum No : 9258

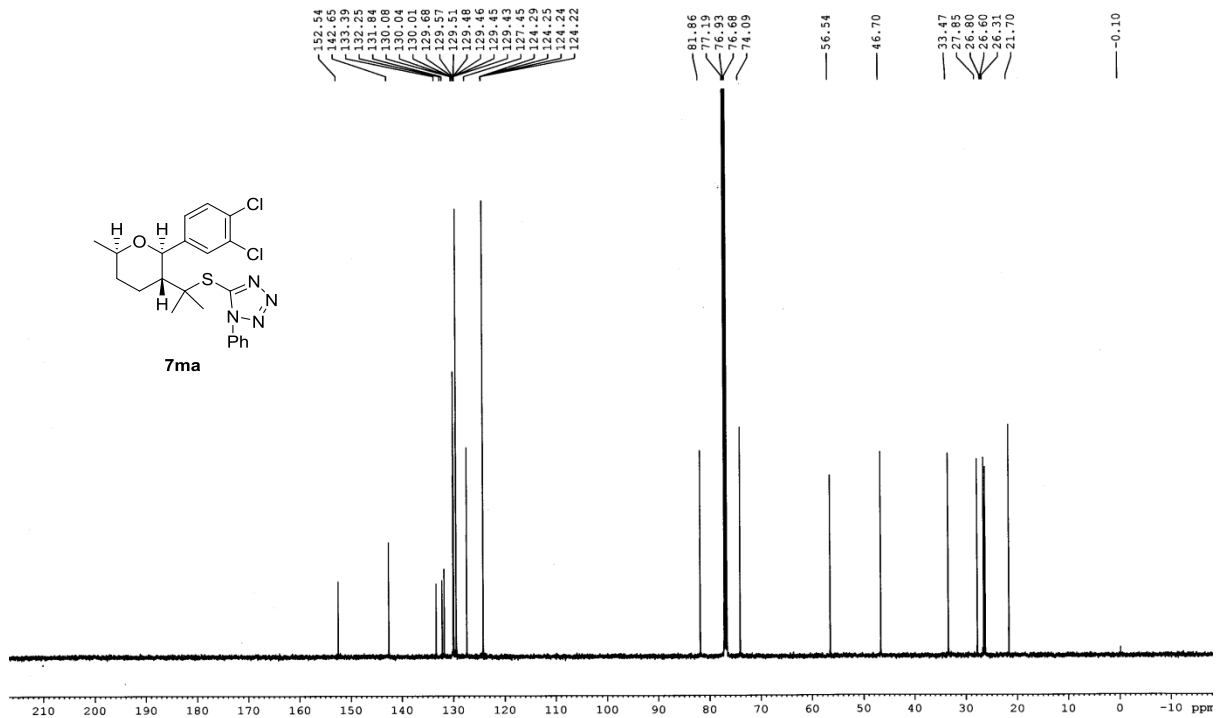

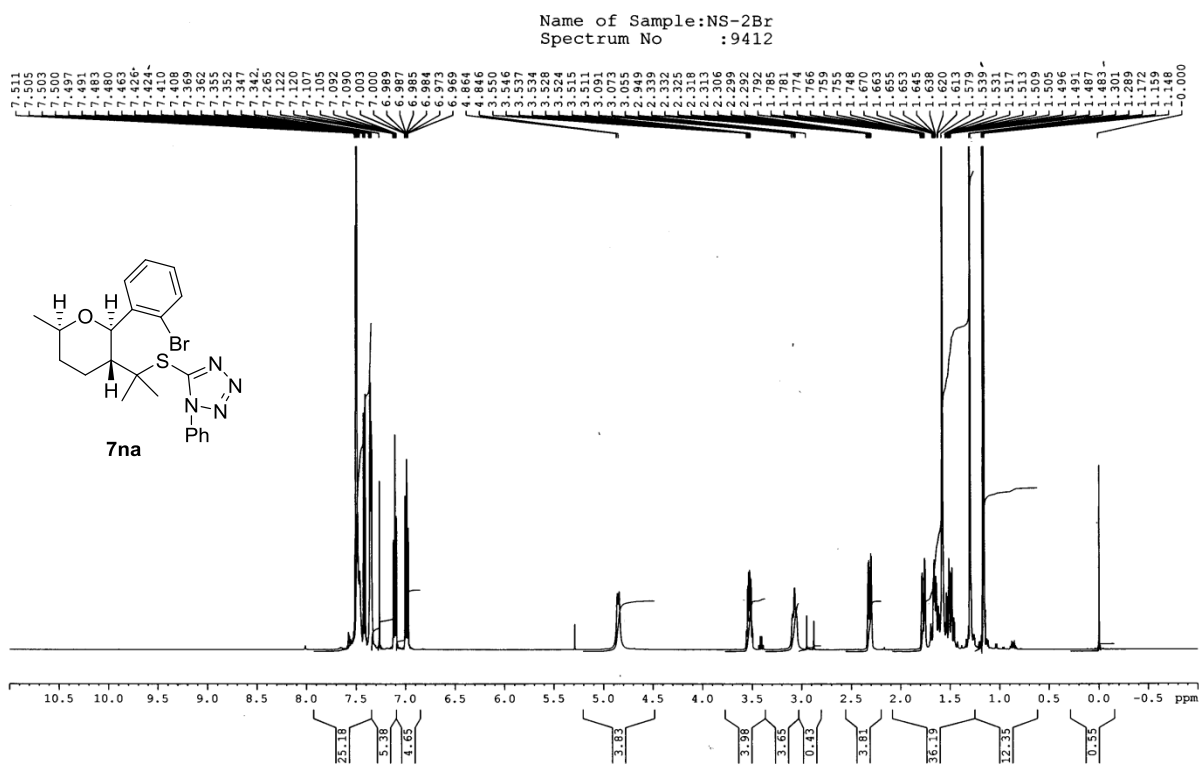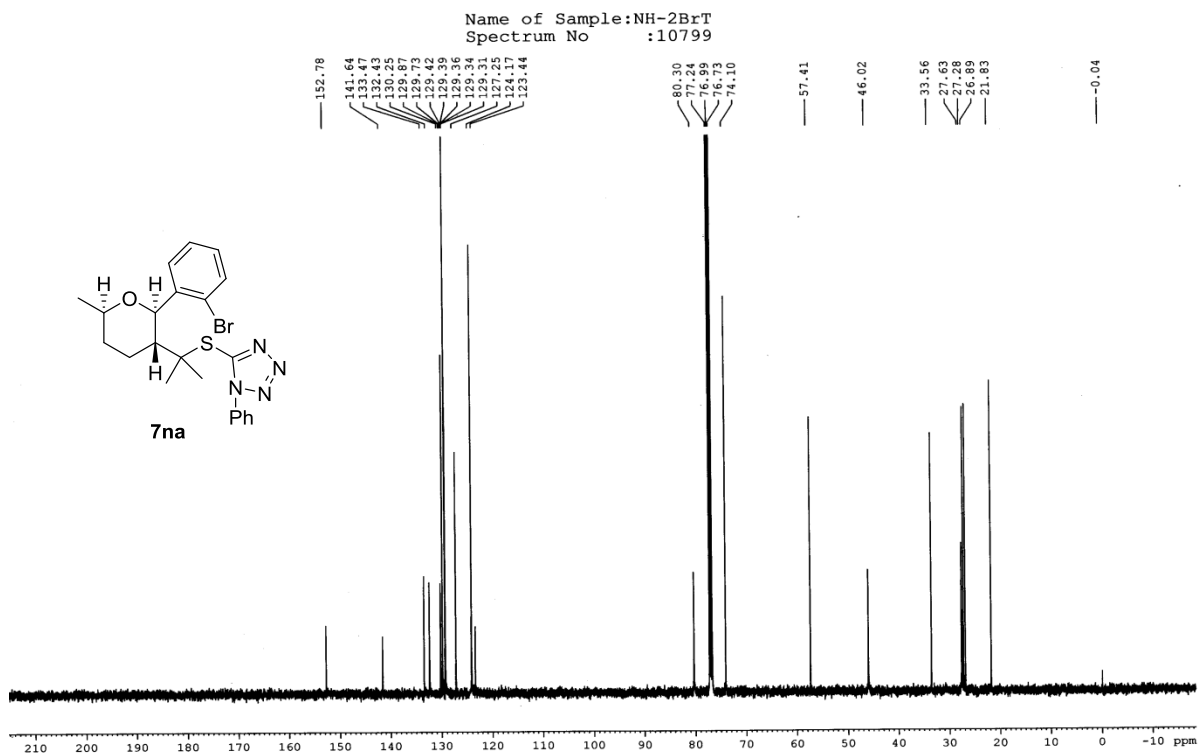

Name of Sample: NS-4  
Spectrum No : 8787

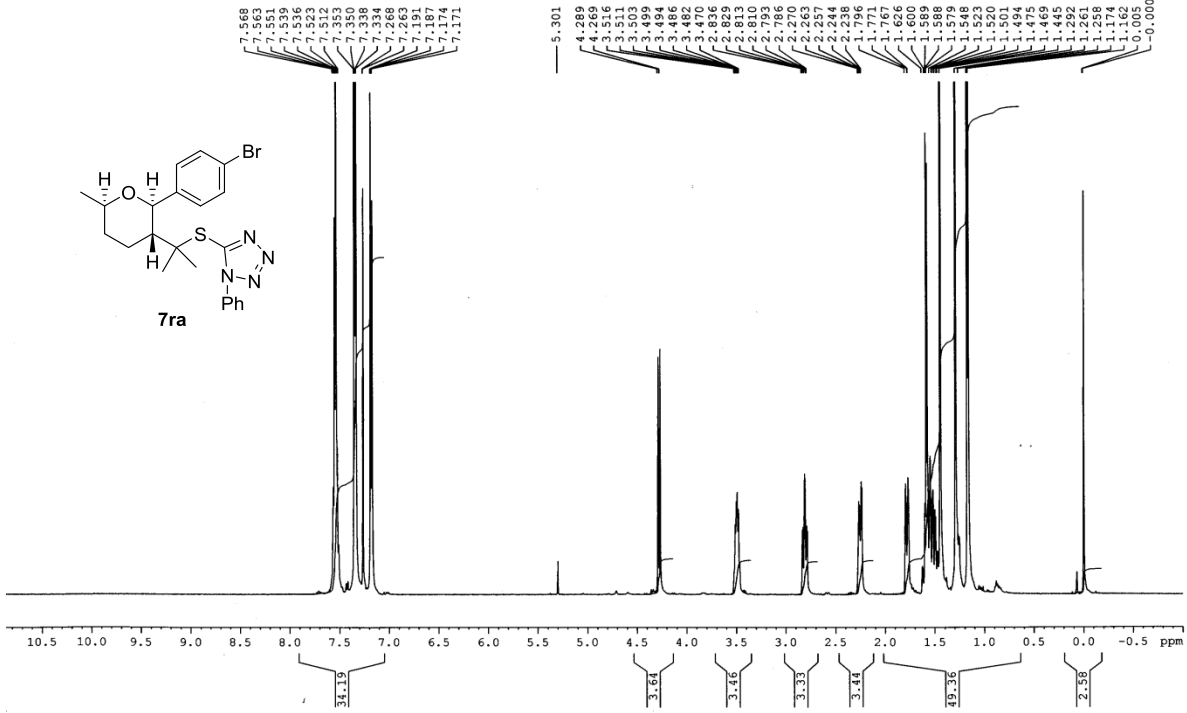

Name of Sample: NH-PBrTH  
Spectrum No : 8812

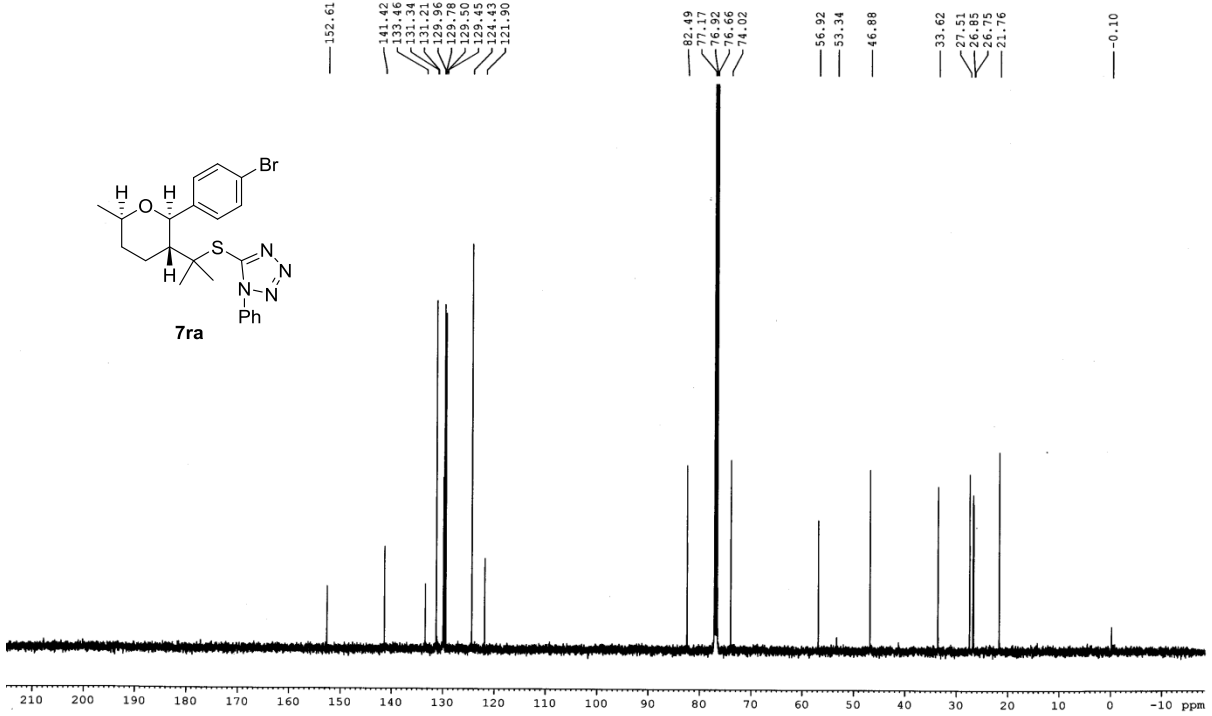

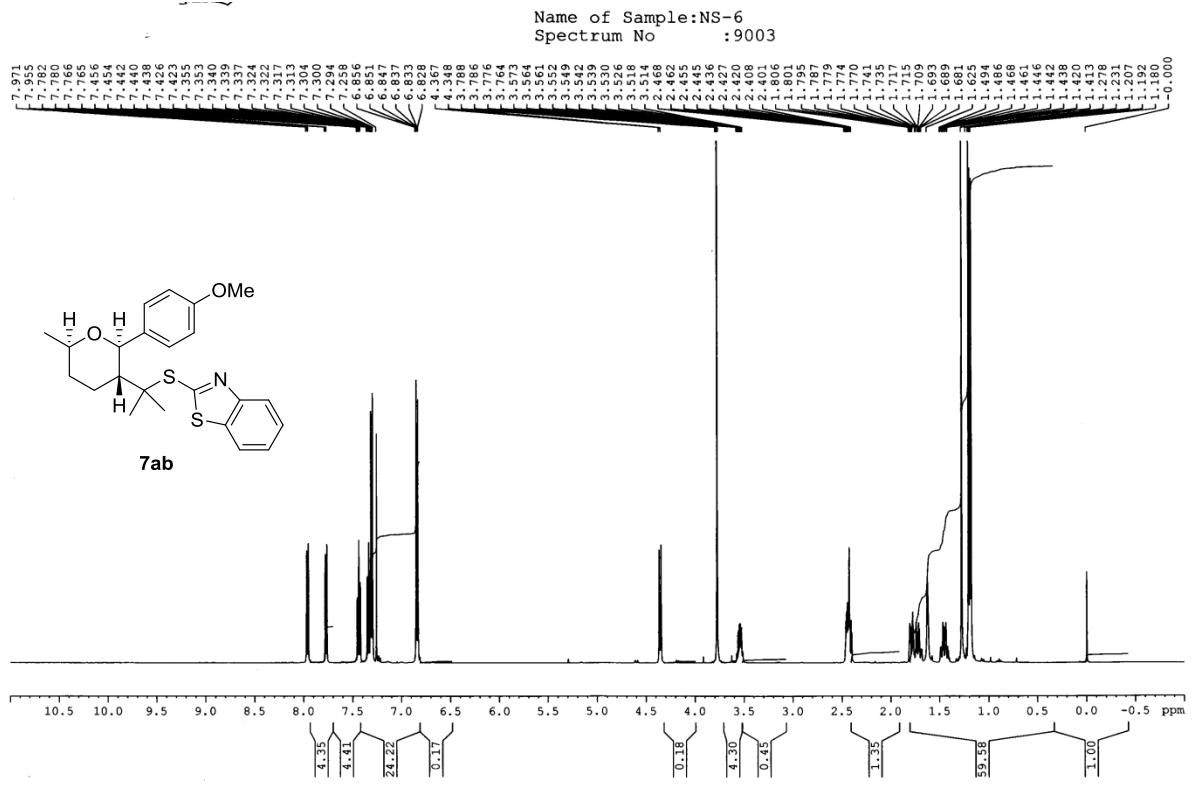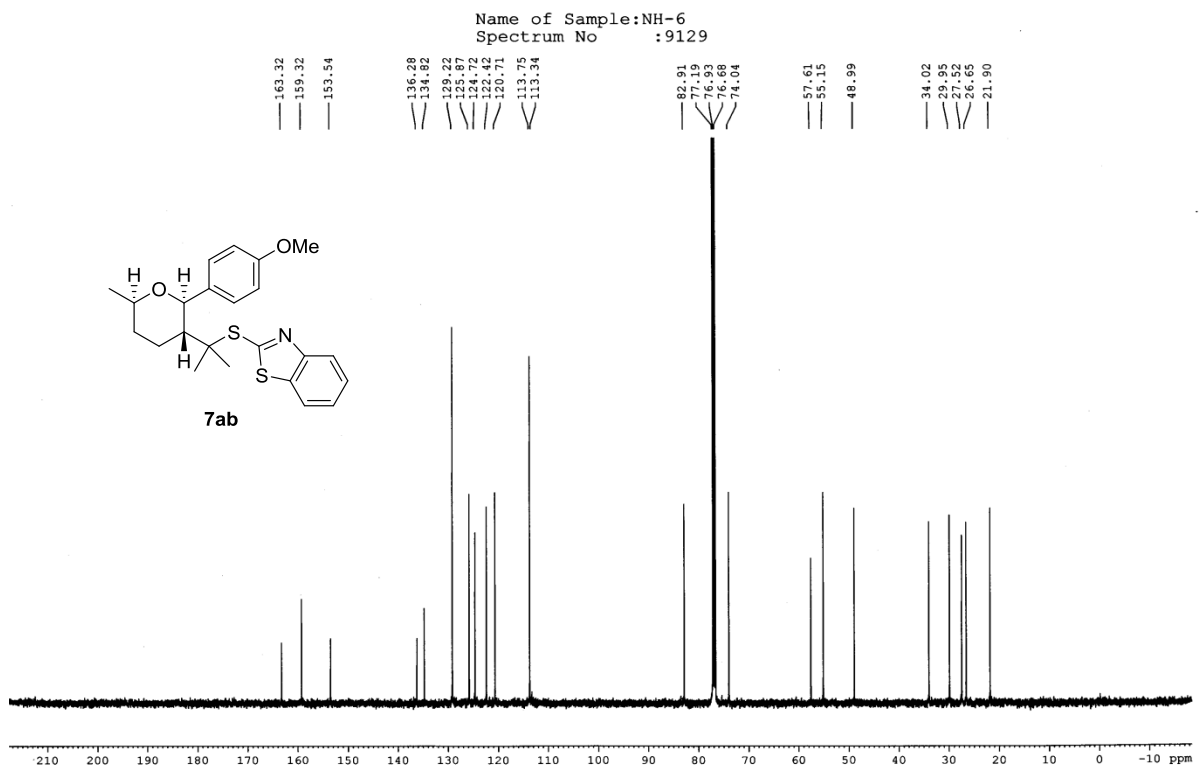

Name of Sample: NS-MPT  
Spectrum No :9443

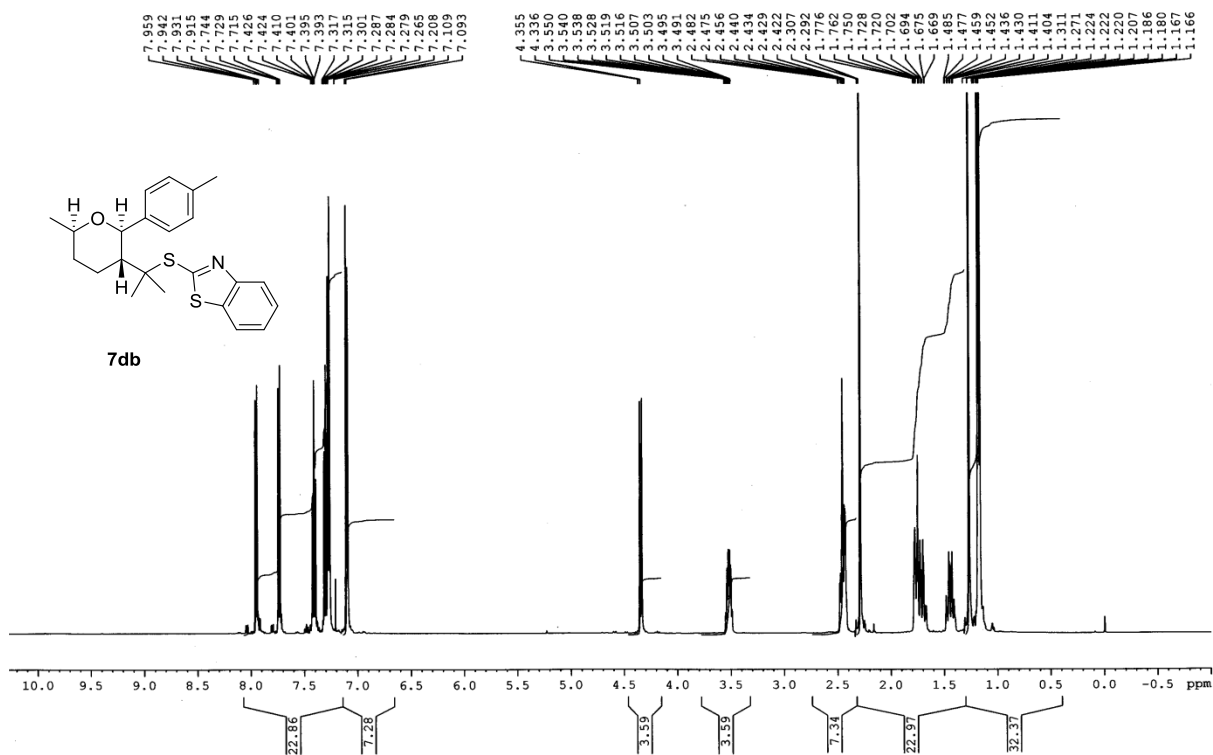

Name of Sample: NH-MPT  
Spectrum No :9404

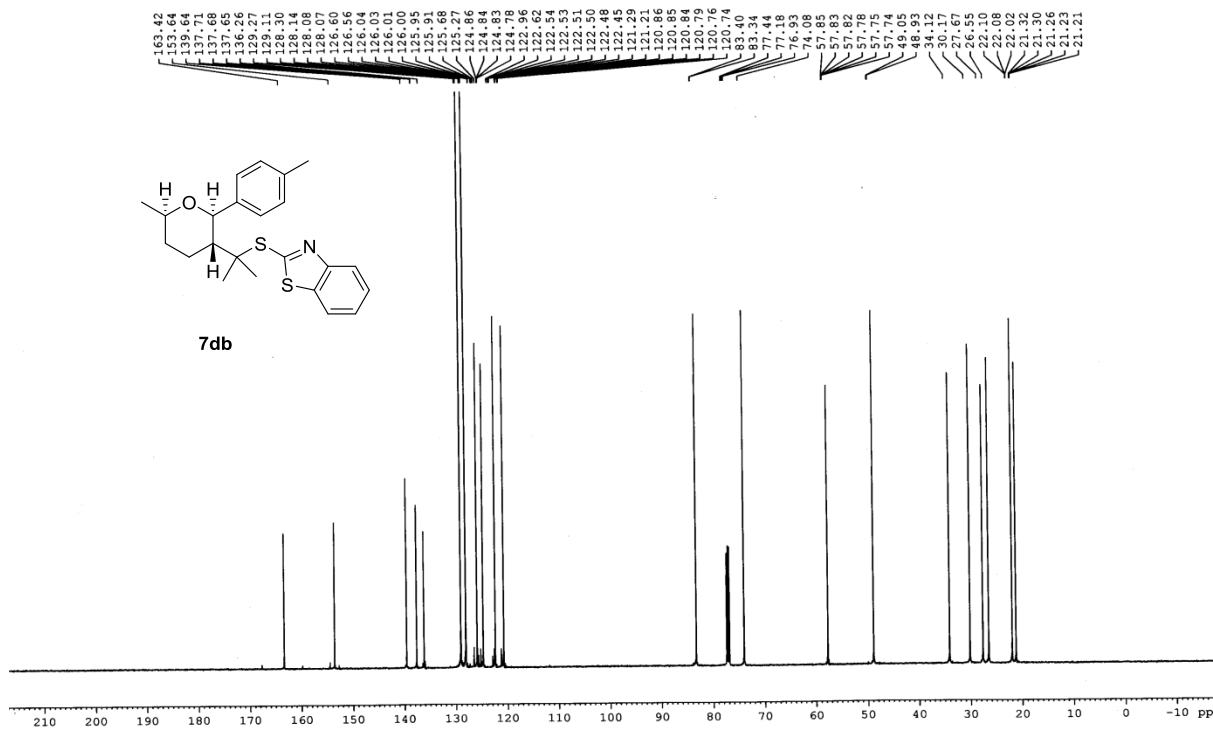

15712  
NH-1

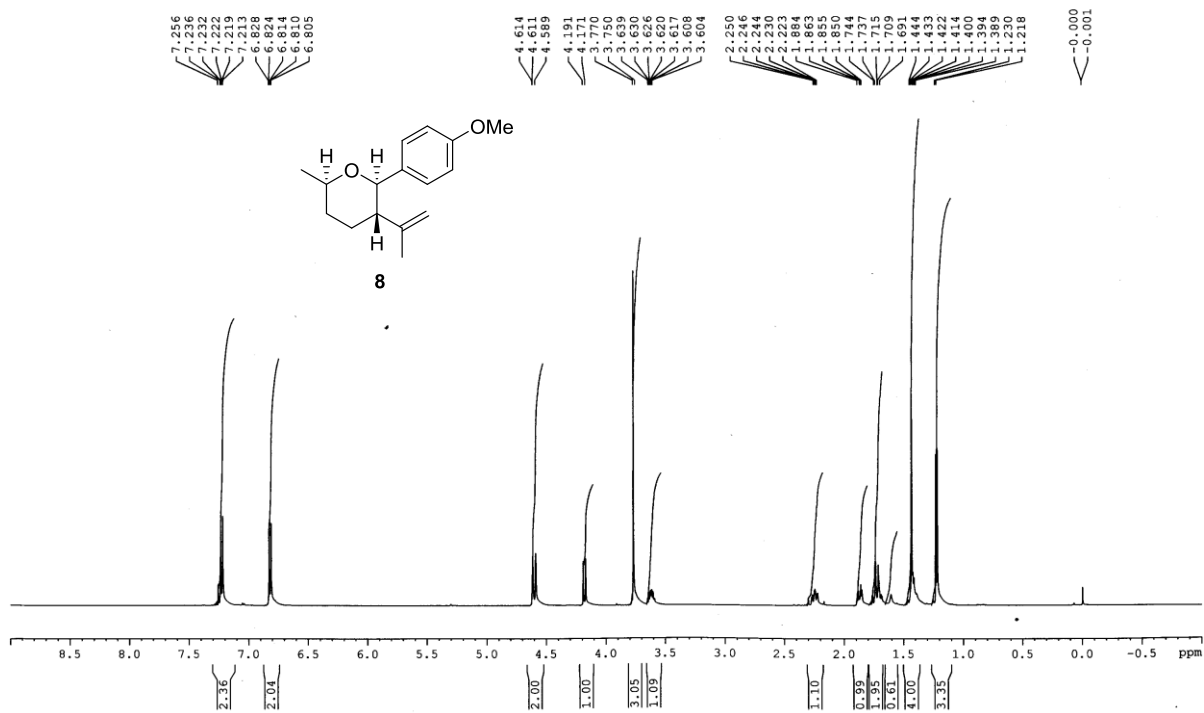

Name of Sample: NH-1  
Spectrum No : 1538

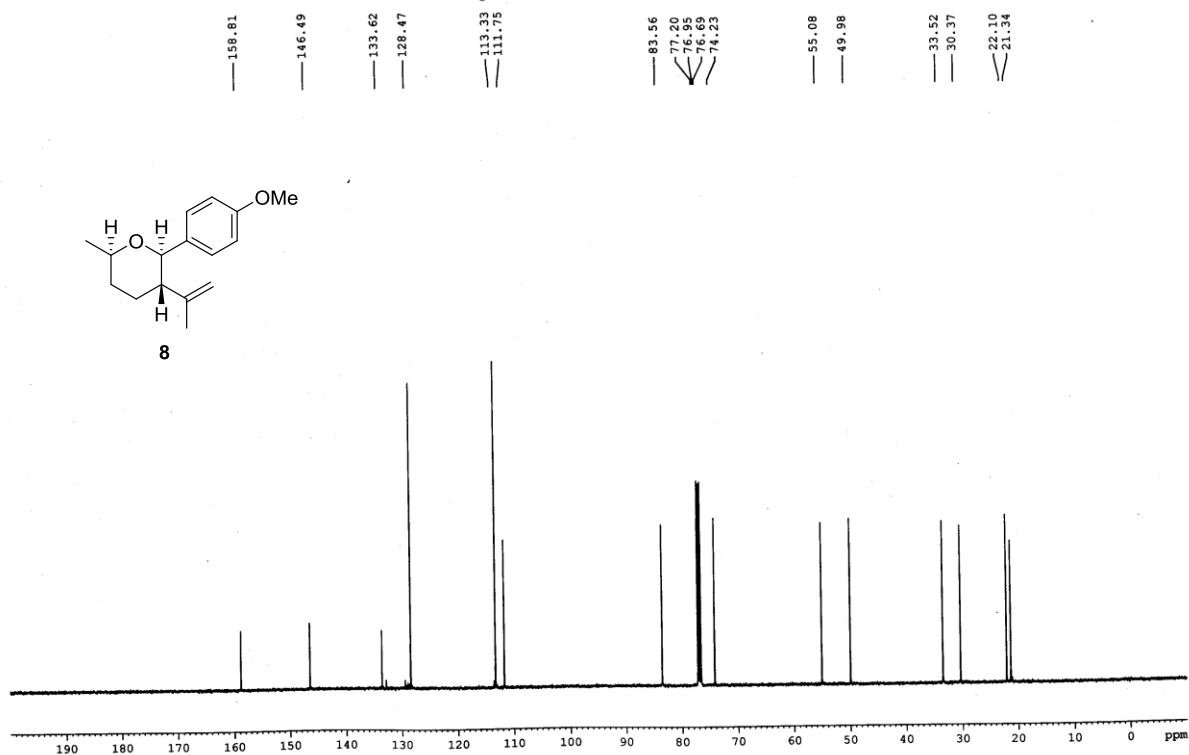

Name of Sample: p-methyl-anisaldehyde  
Spectrum No : 15378

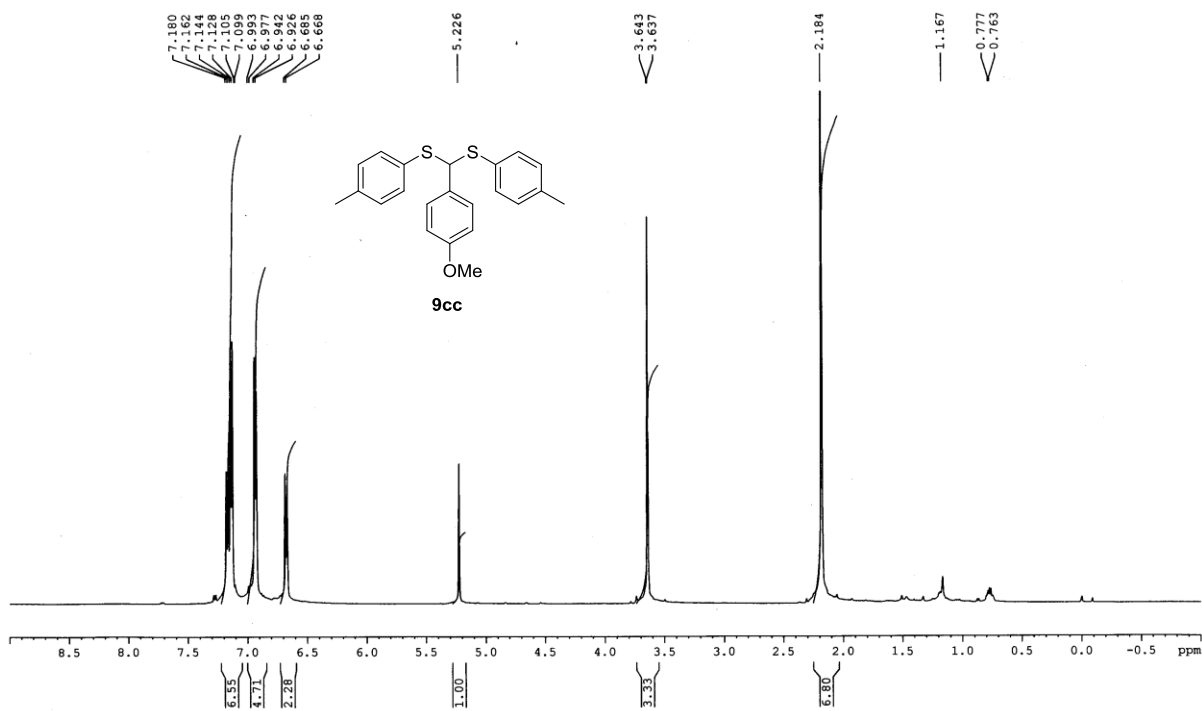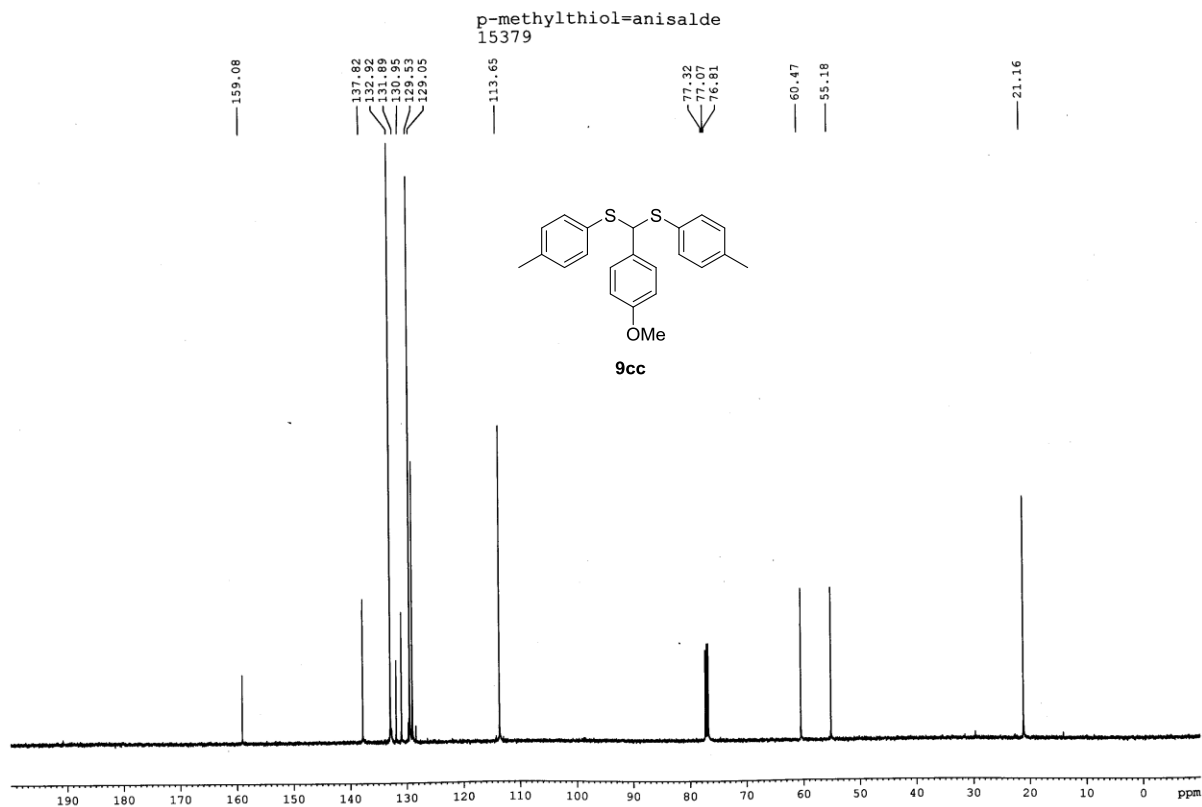



15713  
NH-4-liq

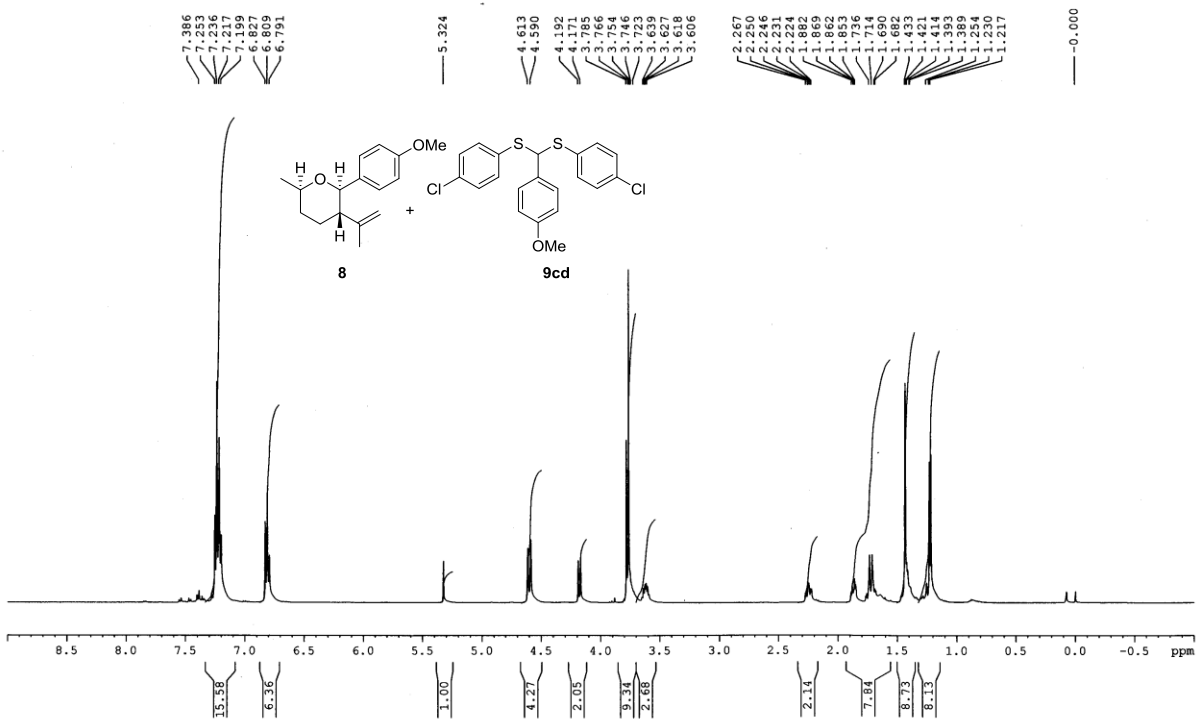

15714  
NH-4-liq

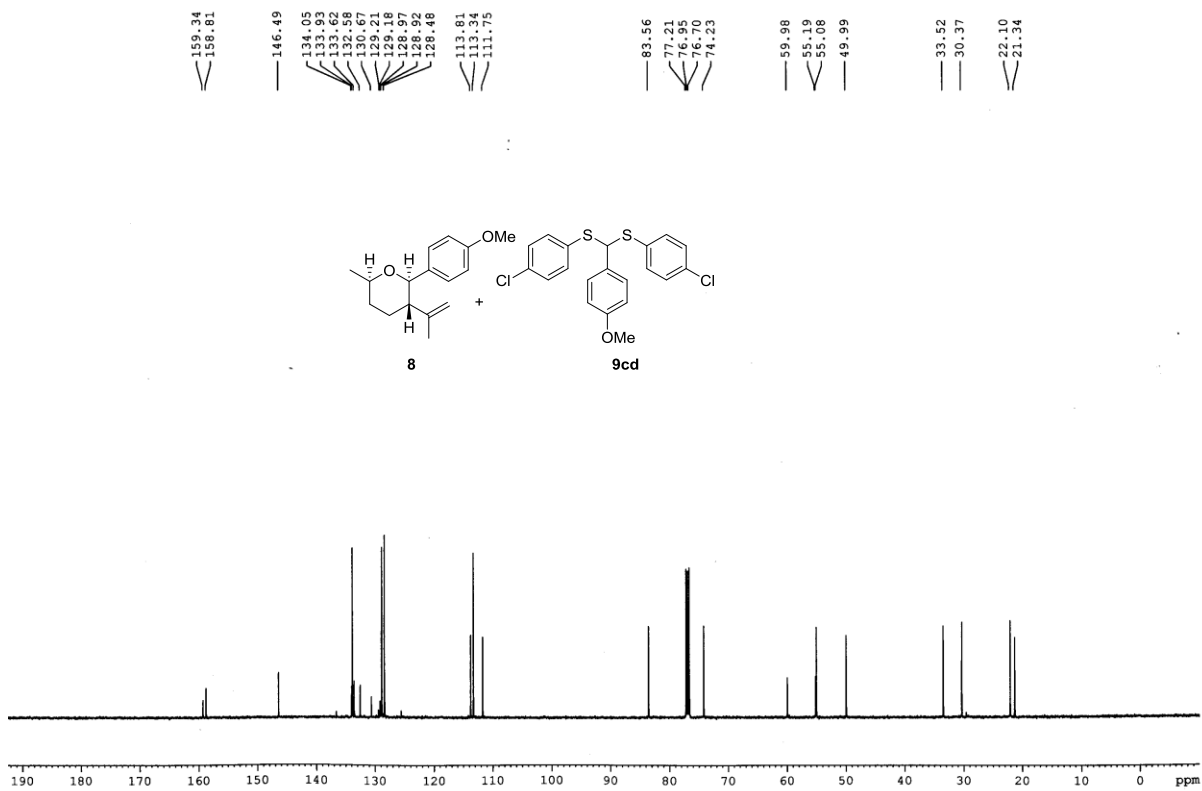

# NOESY Spectrum of the compound **7da**

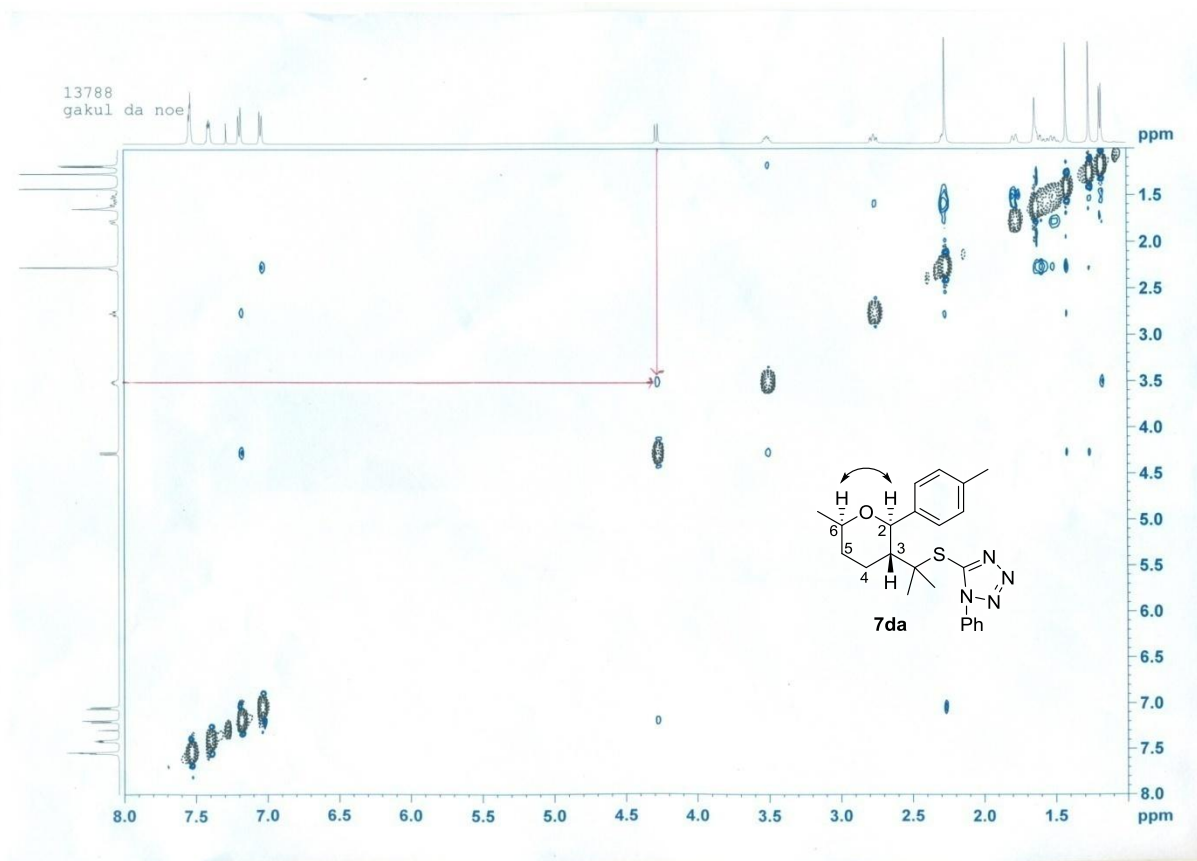

Supplement: c6ob02692c1.pdf [file c6ob02692c1.pdf]
